# Supplementary material for: Untargeted Metabolomics Used to Describe the Chemical Composition, Antioxidant and Antimicrobial Effects of Extracts from Pleurotus spp. Mycelium Grown in Different Culture Media
Source: MDPI journal article supplement (doi:10.3390/antibiotics11111468), 2022-10-25
Supplement: s1 [file s1]

# Chromatogram

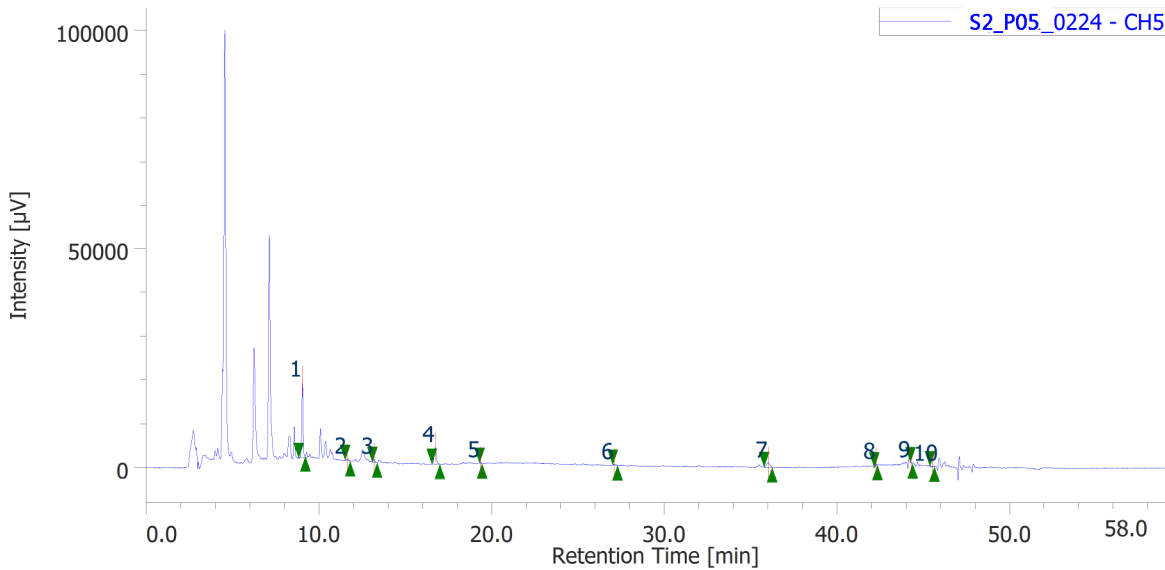

Chromatogram Information

User NameAdministrator

Date Modified3/21/2022 10:36:01 AM

Description

HPLC System NameHPLC2\_DAD

Injection Date2/26/2022 3:35:49 PM

Volume5.00 [μL]

Sample #34

Project NamePhenols\_08\_03\_2022

Acquisition Time59.0 [min]

Acquisition Sequence

Control Method

Peak ID TablePeakID\_PhenolicCompound\_18\_02\_2022\_86

Calibration MethodPhenols\_QUANT\_CALIB\_05\_03\_2022\_Ch5-9

Additional Information

Channel & Peak Information Table

Chromatogram NameS2\_P05\_0224-CH5

Sample Name

Channel Name254.0nm

Sampling Interval200 [msec]

Peak MethodPeakMethod\_05\_03\_2022\_Extracts (Manual)

| #  | Peak Name             | CH | tR [min] | Area [μV-sec] | Height [μV] | Quantity         |
|----|-----------------------|----|----------|---------------|-------------|------------------|
| 1  | Gallic acid           | 5  | 9.043    | 91947         | 17416       | 5.20839 [ug/mL]  |
| 2  | 3-Hydroxytyrosol      | 5  | 11.647   | 3303          | 452         | 1.08113 [ug/mL]  |
| 3  | Caftaric acid         | 5  | 13.193   | 4751          | 804         | 1.14813 [ug/mL]  |
| 4  | 4-Hydroxybenzoic acid | 5  | 16.730   | 34352         | 3878        | N/A              |
| 5  | Vanillic acid         | 5  | 19.360   | 1147          | 218         | N/A              |
| 6  | Benzoic acid          | 5  | 27.097   | 2209          | 271         | 0.978112 [ug/mL] |
| 7  | t-Cinnamic acid       | 5  | 36.007   | 14266         | 1094        | N/A              |
| 8  | Kaempferol            | 5  | 42.267   | 3301          | 560         | N/A              |
| 9  | Carvacrol             | 5  | 44.273   | 372           | 137         | N/A              |
| 10 | 3-Hydroxyflavone      | 5  | 45.520   | 1335          | 170         | N/A              |
