# Supplementary material for: Untargeted Metabolomics Used to Describe the Chemical Composition, Antioxidant and Antimicrobial Effects of Extracts from Pleurotus spp. Mycelium Grown in Different Culture Media
Source: MDPI journal article supplement (doi:10.3390/antibiotics11111468), 2022-10-25
Supplement: s1 [file s1]

# Chromatogram

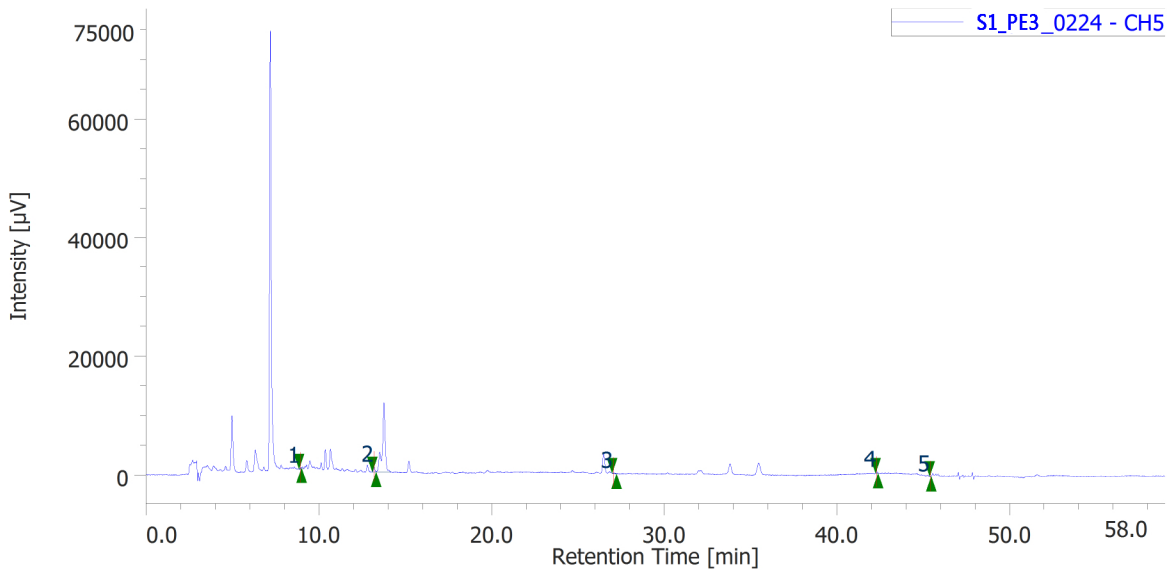

## Chromatogram Information

|                        |                                       |
|------------------------|---------------------------------------|
| User Name              | Administrator                         |
| Date Modified          | 3/14/2022 11:19:56 AM                 |
| Description            |                                       |
| HPLC System Name       | HPLC2_DAD                             |
| Injection Date         | 2/25/2022 7:25:58 PM                  |
| Volume                 | 5.00 [µL]                             |
| Sample #               | 17                                    |
| Project Name           | Phenols_08_03_2022                    |
| Acquisition Time       | 59.0 [min]                            |
| Acquisition Sequence   |                                       |
| Control Method         |                                       |
| Peak ID Table          | PeakID_PhenolicCompound_18_02_2022_86 |
| Calibration Method     | Phenols_QUANT_CALIB_05_03_2022_Ch5-9  |
| Additional Information |                                       |

## Channel & Peak Information Table

|                   |                                         |
|-------------------|-----------------------------------------|
| Chromatogram Name | S1_PE3_0224-CH5                         |
| Sample Name       |                                         |
| Channel Name      | 254.0nm                                 |
| Sampling Interval | 200 [msec]                              |
| Peak Method       | PeakMethod_05_03_2022_Extracts (Manual) |

| # | Peak Name        | CH | tR [min] | Area [µV-sec] | Height [µV] | Quantity         |
|---|------------------|----|----------|---------------|-------------|------------------|
| 1 | Gallic acid      | 5  | 8.940    | 1175          | 245         | N/A              |
| 2 | Caftaric acid    | 5  | 13.190   | 5578          | 879         | 1.21918 [ug/mL]  |
| 3 | Benzoic acid     | 5  | 27.067   | 888           | 114         | 0.494009 [ug/mL] |
| 4 | Kaempferol       | 5  | 42.300   | 1284          | 238         | N/A              |
| 5 | 3-Hydroxyflavone | 5  | 45.407   | 156           | 56          | N/A              |
