# Supplementary material for: Untargeted Metabolomics Used to Describe the Chemical Composition, Antioxidant and Antimicrobial Effects of Extracts from Pleurotus spp. Mycelium Grown in Different Culture Media
Source: MDPI journal article supplement (doi:10.3390/antibiotics11111468), 2022-10-25
Supplement: s1 [file s1]

# Chromatogram

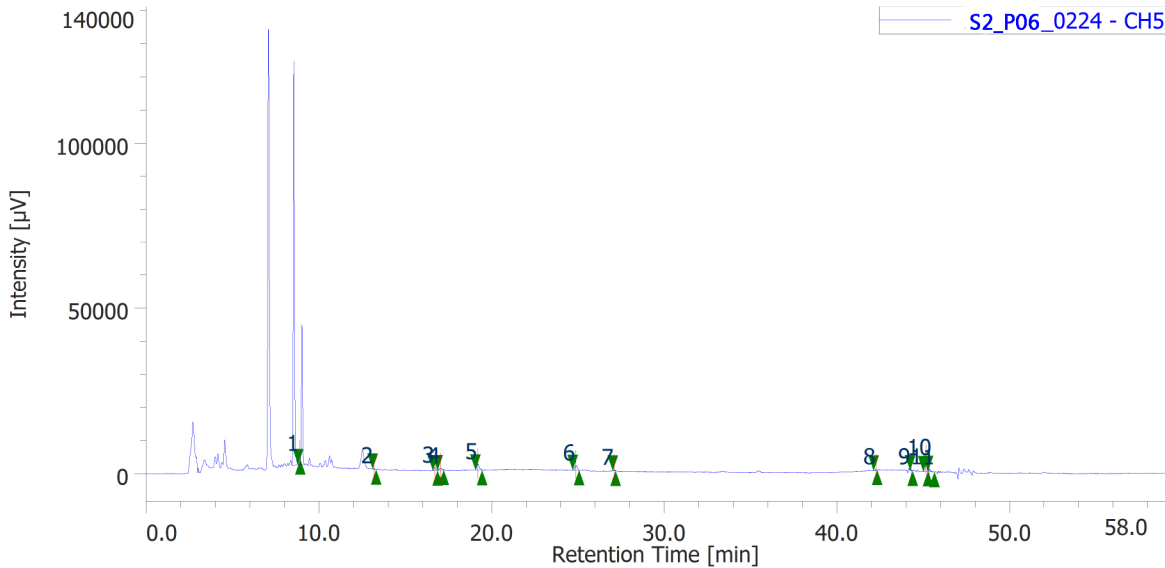

Chromatogram Information

User NameAdministrator

Date Modified3/21/2022 10:36:01 AM

Description

HPLC System NameHPLC2\_DAD

Injection Date2/26/2022 4:36:18 PM

Volume5.00 [µL]

Sample #35

Project NamePhenols\_08\_03\_2022

Acquisition Time59.0 [min]

Acquisition Sequence

Control Method

Peak ID TablePeakID\_PhenolicCompound\_18\_02\_2022\_86

Calibration MethodPhenols\_QUANT\_CALIB\_05\_03\_2022\_Ch5-9

Additional Information

Channel & Peak Information Table

Chromatogram NameS2\_P06\_0224-CH5

Sample Name

Channel Name254.0nm

Sampling Interval200 [msec]

Peak MethodPeakMethod\_05\_03\_2022\_Extracts (Manual)

| #  | Peak Name             | CH | tR [min] | Area [µV-sec] | Height [µV] | Quantity          |
|----|-----------------------|----|----------|---------------|-------------|-------------------|
| 1  | Gallic acid           | 5  | 8.873    | 13615         | 2825        | 0.236166 [ug/mL]  |
| 2  | Caftaric acid         | 5  | 13.173   | 1724          | 319         | 0.888139 [ug/mL]  |
| 3  | 4-Hydroxybenzoic acid | 5  | 16.713   | 7005          | 898         | N/A               |
| 4  | Loganic acid          | 5  | 17.027   | 6578          | 619         | 0.0359548 [ug/mL] |
| 5  | Vanillic acid         | 5  | 19.200   | 18167         | 1810        | N/A               |
| 6  | t-Ferulic acid        | 5  | 24.883   | 15311         | 1439        | 0.250916 [ug/mL]  |
| 7  | Benzoic acid          | 5  | 27.097   | 1703          | 277         | 0.792797 [ug/mL]  |
| 8  | Kaempferol            | 5  | 42.267   | 1332          | 217         | N/A               |
| 9  | Carvacrol             | 5  | 44.273   | 1595          | 405         | N/A               |
| 10 | Flavone               | 5  | 45.160   | 17779         | 3381        | N/A               |
| 11 | 3-Hydroxyflavone      | 5  | 45.343   | 4974          | 706         | N/A               |
