# Supplementary material for: Untargeted Metabolomics Used to Describe the Chemical Composition, Antioxidant and Antimicrobial Effects of Extracts from Pleurotus spp. Mycelium Grown in Different Culture Media
Source: MDPI journal article supplement (doi:10.3390/antibiotics11111468), 2022-10-25
Supplement: s1 [file s1]

# Chromatogram

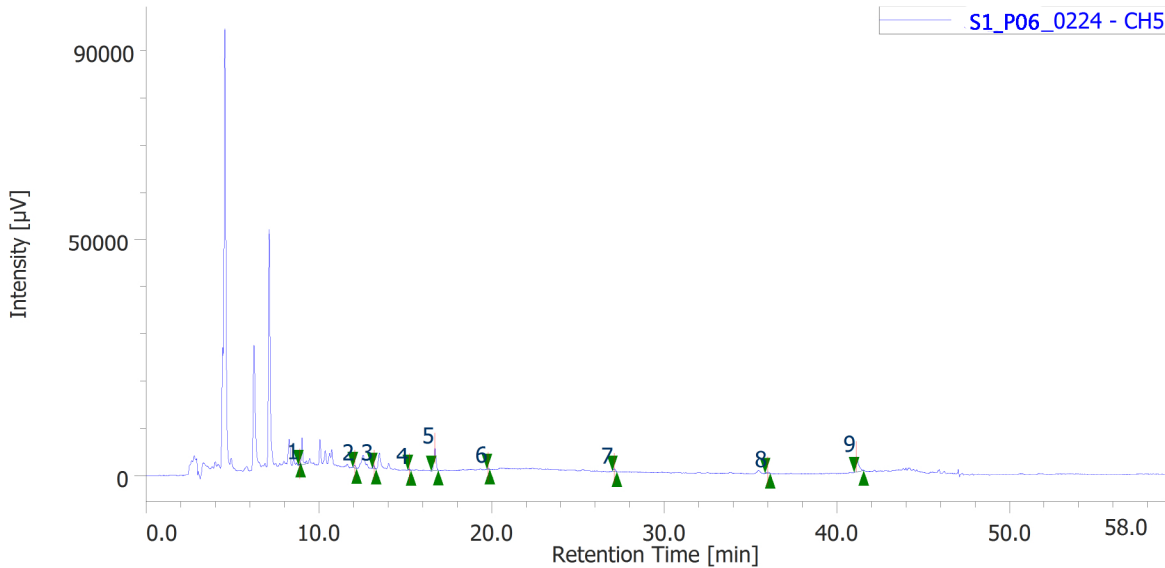

Chromatogram Information

|                        |                                       |
|------------------------|---------------------------------------|
| User Name              | Administrator                         |
| Date Modified          | 3/15/2022 9:46:01 AM                  |
| Description            |                                       |
| HPLC System Name       | HPLC2_DAD                             |
| Injection Date         | 2/26/2022 2:29:28 AM                  |
| Volume                 | 5.00 [µL]                             |
| Sample #               | 23                                    |
| Project Name           | Phenols_08_03_2022                    |
| Acquisition Time       | 59.0 [min]                            |
| Acquisition Sequence   |                                       |
| Control Method         |                                       |
| Peak ID Table          | PeakID_PhenolicCompound_18_02_2022_86 |
| Calibration Method     | Phenols_QUANT_CALIB_05_03_2022_Ch5-9  |
| Additional Information |                                       |

Channel & Peak Information Table

|                   |                                         |
|-------------------|-----------------------------------------|
| Chromatogram Name | S1_P06_0224-CH5                         |
| Sample Name       |                                         |
| Channel Name      | 254.0nm                                 |
| Sampling Interval | 200 [msec]                              |
| Peak Method       | PeakMethod_05_03_2022_Extracts (Manual) |

| # | Peak Name             | CH | tR [min] | Area [µV·sec] | Height [µV] | Quantity        |
|---|-----------------------|----|----------|---------------|-------------|-----------------|
| 1 | Gallic acid           | 5  | 8.877    | 1602          | 240         | N/A             |
| 2 | 3-Hydroxytyrosol      | 5  | 12.080   | 4312          | 533         | 1.56411 [ug/mL] |
| 3 | Caftaric acid         | 5  | 13.173   | 4103          | 701         | 1.09248 [ug/mL] |
| 4 | Catechin              | 5  | 15.220   | 1603          | 275         | 1.86523 [ug/mL] |
| 5 | 4-Hydroxybenzoic acid | 5  | 16.713   | 41623         | 4721        | N/A             |
| 6 | Caffeic acid          | 5  | 19.797   | 1625          | 309         | N/A             |
| 7 | Benzoic acid          | 5  | 27.090   | 4909          | 583         | 1.96773 [ug/mL] |
| 8 | t-Cinnamic acid       | 5  | 35.983   | 2748          | 257         | N/A             |
| 9 | Hesperetin            | 5  | 41.120   | 40905         | 3248        | 11.8275 [ug/mL] |
