# Supplementary material for: Untargeted Metabolomics Used to Describe the Chemical Composition, Antioxidant and Antimicrobial Effects of Extracts from Pleurotus spp. Mycelium Grown in Different Culture Media
Source: MDPI journal article supplement (doi:10.3390/antibiotics11111468), 2022-10-25
Supplement: s1 [file s1]

# Chromatogram

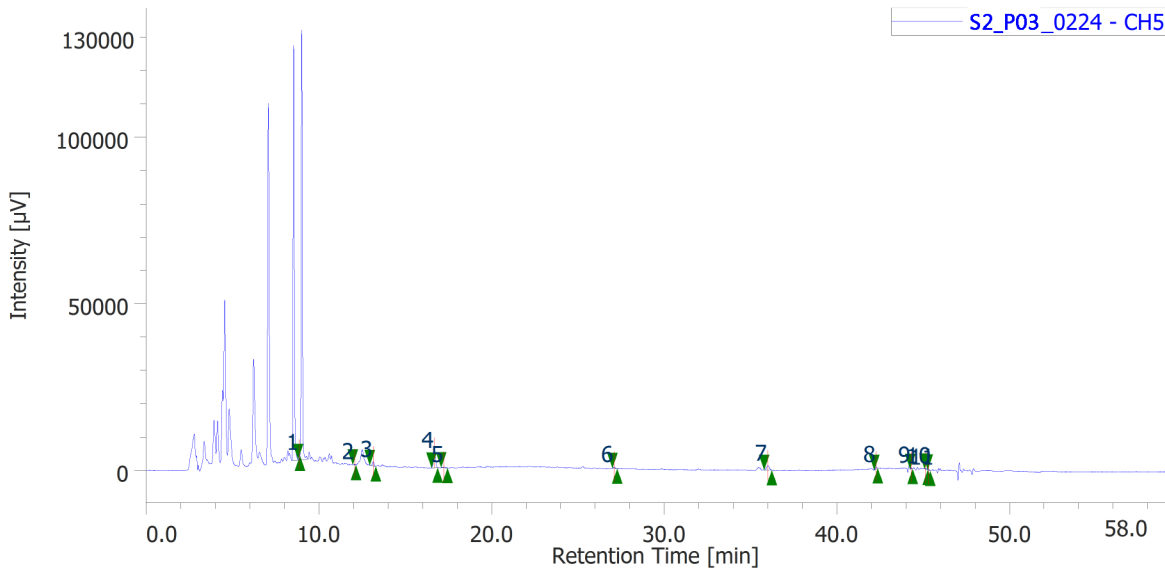

Chromatogram Information

User NameAdministrator

Date Modified3/21/2022 10:36:00 AM

DescriptionHPLC2\_DAD

HPLC System Name2/26/2022 11:33:53 AM

Injection Date5.00 [µL]

Volume31

Sample #Phenols\_08\_03\_2022

Project Name59.0 [min]

Acquisition Time

Acquisition Sequence

Control Method

Peak ID TablePeakID\_PhenolicCompound\_18\_02\_2022\_86

Calibration MethodPhenols\_QUANT\_CALIB\_05\_03\_2022\_Ch5-9

Additional Information

Channel & Peak Information Table

Chromatogram NameS2\_P03\_0224-CH5

Sample Name

Channel Name254.0nm

Sampling Interval200 [msec]

Peak MethodPeakMethod\_05\_03\_2022\_Extracts (Manual)

| #  | Peak Name             | CH | tR [min] | Area [µV-sec] | Height [µV] | Quantity         |
|----|-----------------------|----|----------|---------------|-------------|------------------|
| 1  | Gallic acid           | 5  | 8.860    | 6620          | 1581        | N/A              |
| 2  | 3-Hydroxytyrosol      | 5  | 12.060   | 1359          | 264         | 0.150420 [ug/mL] |
| 3  | Caftaric acid         | 5  | 13.140   | 8253          | 1268        | 1.44894 [ug/mL]  |
| 4  | 4-Hydroxybenzoic acid | 5  | 16.687   | 39072         | 4471        | N/A              |
| 5  | Loganic acid          | 5  | 17.237   | 2465          | 205         | N/A              |
| 6  | Benzoic acid          | 5  | 27.090   | 3230          | 401         | 1.35241 [ug/mL]  |
| 7  | t-Cinnamic acid       | 5  | 35.987   | 16768         | 1353        | N/A              |
| 8  | Kaempferol            | 5  | 42.267   | 3704          | 608         | N/A              |
| 9  | Carvacrol             | 5  | 44.283   | 1805          | 456         | N/A              |
| 10 | Flavone               | 5  | 45.117   | 1817          | 279         | N/A              |
| 11 | 3-Hydroxyflavone      | 5  | 45.303   | 1008          | 234         | N/A              |
