# Supplementary material for: Untargeted Metabolomics Used to Describe the Chemical Composition, Antioxidant and Antimicrobial Effects of Extracts from Pleurotus spp. Mycelium Grown in Different Culture Media
Source: MDPI journal article supplement (doi:10.3390/antibiotics11111468), 2022-10-25
Supplement: s1 [file s1]

# Chromatogram

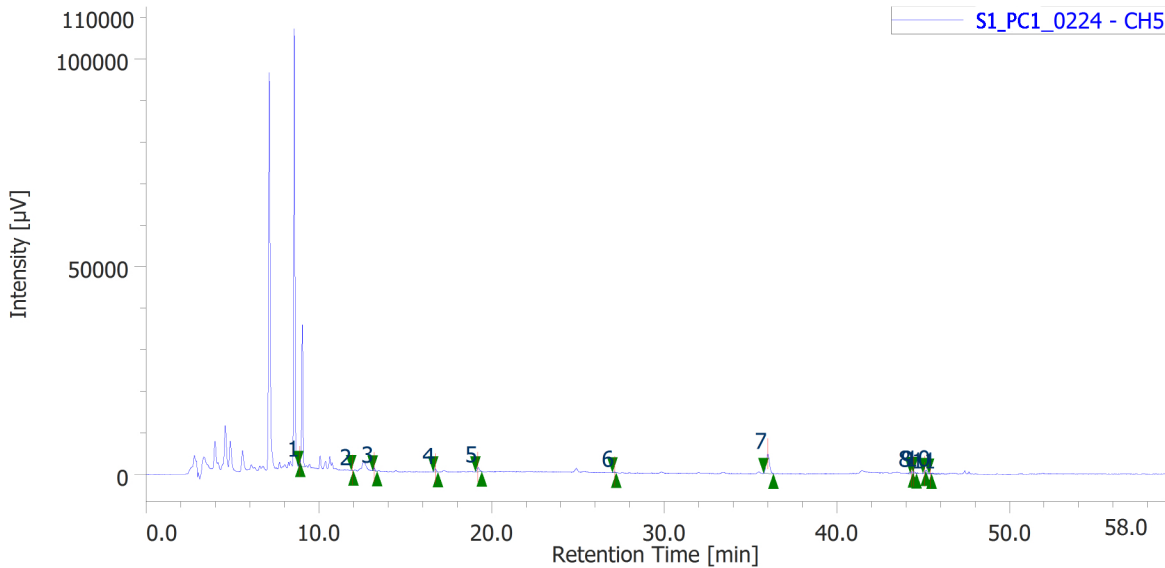

## Chromatogram Information

|                        |                                       |
|------------------------|---------------------------------------|
| User Name              | Administrator                         |
| Date Modified          | 3/14/2022 11:18:47 AM                 |
| Description            |                                       |
| HPLC System Name       | HPLC2_DAD                             |
| Injection Date         | 2/25/2022 4:24:24 PM                  |
| Volume                 | 5.00 [µL]                             |
| Sample #               | 12                                    |
| Project Name           | Phenols_08_03_2022                    |
| Acquisition Time       | 59.0 [min]                            |
| Acquisition Sequence   |                                       |
| Control Method         |                                       |
| Peak ID Table          | PeakID_PhenolicCompound_18_02_2022_86 |
| Calibration Method     | Phenols_QUANT_CALIB_05_03_2022_Ch5-9  |
| Additional Information |                                       |

## Channel & Peak Information Table

|                   |                                         |
|-------------------|-----------------------------------------|
| Chromatogram Name | S1-PC1_0224-CH5                         |
| Sample Name       |                                         |
| Channel Name      | 254.0nm                                 |
| Sampling Interval | 200 [msec]                              |
| Peak Method       | PeakMethod_05_03_2022_Extracts (Manual) |

| #  | Peak Name             | CH | tR [min] | Area [µV-sec] | Height [µV] | Quantity         |
|----|-----------------------|----|----------|---------------|-------------|------------------|
| 1  | Gallic acid           | 5  | 8.897    | 4407          | 1217        | N/A              |
| 2  | 3-Hydroxytyrosol      | 5  | 11.933   | 239           | 72          | N/A              |
| 3  | Caftaric acid         | 5  | 13.197   | 4609          | 811         | 1.13593 [ug/mL]  |
| 4  | 4-Hydroxybenzoic acid | 5  | 16.737   | 5670          | 701         | N/A              |
| 5  | Vanillic acid         | 5  | 19.207   | 10106         | 1025        | N/A              |
| 6  | Benzoic acid          | 5  | 27.117   | 1752          | 212         | 0.810720 [ug/mL] |
| 7  | t-Cinnamic acid       | 5  | 35.983   | 62047         | 4682        | 0.408235 [ug/mL] |
| 8  | Carvacrol             | 5  | 44.293   | 3384          | 476         | N/A              |
| 9  | Thymol                | 5  | 44.447   | 3766          | 481         | N/A              |
| 10 | Flavone               | 5  | 45.077   | 3570          | 559         | N/A              |
| 11 | 3-Hydroxyflavone      | 5  | 45.407   | 978           | 213         | N/A              |
