# Supplementary material for: Untargeted Metabolomics Used to Describe the Chemical Composition, Antioxidant and Antimicrobial Effects of Extracts from Pleurotus spp. Mycelium Grown in Different Culture Media
Source: MDPI journal article supplement (doi:10.3390/antibiotics11111468), 2022-10-25
Supplement: s1 [file s1]

# Chromatogram

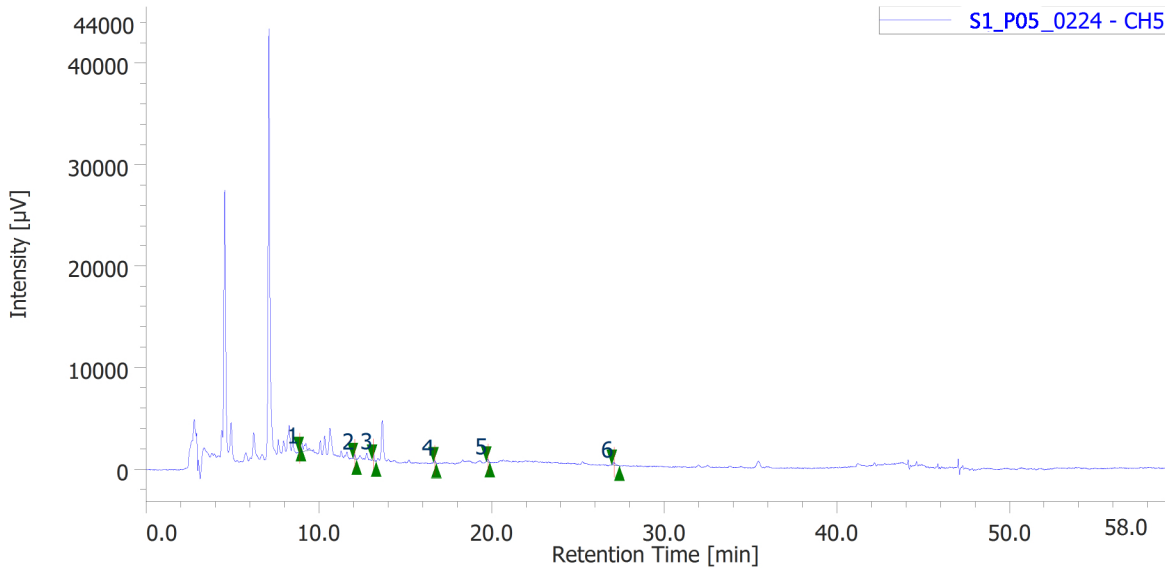

Chromatogram Information

|                        |                                       |
|------------------------|---------------------------------------|
| User Name              | Administrator                         |
| Date Modified          | 3/15/2022 9:46:00 AM                  |
| Description            |                                       |
| HPLC System Name       | HPLC2_DAD                             |
| Injection Date         | 2/26/2022 1:28:58 AM                  |
| Volume                 | 5.00 [µL]                             |
| Sample #               | 22                                    |
| Project Name           | Phenols_08_03_2022                    |
| Acquisition Time       | 59.0 [min]                            |
| Acquisition Sequence   |                                       |
| Control Method         |                                       |
| Peak ID Table          | PeakID_PhenolicCompound_18_02_2022_86 |
| Calibration Method     | Phenols_QUANT_CALIB_05_03_2022_Ch5-9  |
| Additional Information |                                       |

Channel & Peak Information Table

|                   |                                         |
|-------------------|-----------------------------------------|
| Chromatogram Name | S1_P05_0224-CH5                         |
| Sample Name       |                                         |
| Channel Name      | 254.0nm                                 |
| Sampling Interval | 200 [msec]                              |
| Peak Method       | PeakMethod_05_03_2022_Extracts (Manual) |

| # | Peak Name             | CH | tR [min] | Area [µV·sec] | Height [µV] | Quantity         |
|---|-----------------------|----|----------|---------------|-------------|------------------|
| 1 | Gallic acid           | 5  | 8.887    | 2529          | 359         | N/A              |
| 2 | 3-Hydroxytyrosol      | 5  | 12.077   | 2913          | 451         | 0.894321 [ug/mL] |
| 3 | Caftaric acid         | 5  | 13.140   | 3705          | 611         | 1.05835 [ug/mL]  |
| 4 | 4-Hydroxybenzoic acid | 5  | 16.697   | 1344          | 218         | N/A              |
| 5 | Caffeic acid          | 5  | 19.773   | 1642          | 264         | N/A              |
| 6 | Benzoic acid          | 5  | 27.090   | 2661          | 274         | 1.14383 [ug/mL]  |
