# Supplementary material for: Untargeted Metabolomics Used to Describe the Chemical Composition, Antioxidant and Antimicrobial Effects of Extracts from Pleurotus spp. Mycelium Grown in Different Culture Media
Source: MDPI journal article supplement (doi:10.3390/antibiotics11111468), 2022-10-25
Supplement: s1 [file s1]

# Chromatogram

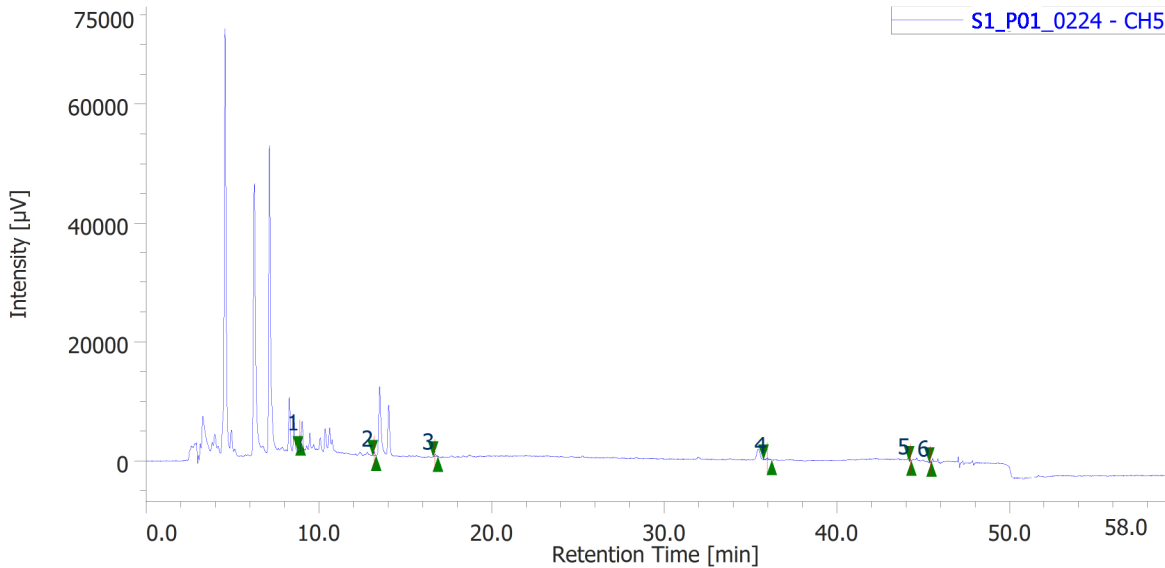

Chromatogram Information

|                        |                                       |
|------------------------|---------------------------------------|
| User Name              | Administrator                         |
| Date Modified          | 3/8/2022 2:29:48 PM                   |
| Description            |                                       |
| HPLC System Name       | HPLC2_DAD                             |
| Injection Date         | 2/25/2022 5:24:57 PM                  |
| Volume                 | 5.00 [µL]                             |
| Sample #               | 14                                    |
| Project Name           | Phenols_08_03_2022                    |
| Acquisition Time       | 59.0 [min]                            |
| Acquisition Sequence   |                                       |
| Control Method         |                                       |
| Peak ID Table          | PeakID_PhenolicCompound_18_02_2022_86 |
| Calibration Method     | Phenols_QUANT_CALIB_05_03_2022_Ch5-9  |
| Additional Information |                                       |

Channel & Peak Information Table

|                   |                                         |
|-------------------|-----------------------------------------|
| Chromatogram Name | S1_P01_0224-CH5                         |
| Sample Name       |                                         |
| Channel Name      | 254.0nm                                 |
| Sampling Interval | 200 [msec]                              |
| Peak Method       | PeakMethod_05_03_2022_Extracts (Manual) |

| # | Peak Name             | CH | tR [min] | Area [µV·sec] | Height [µV] | Quantity         |
|---|-----------------------|----|----------|---------------|-------------|------------------|
| 1 | Gallic acid           | 5  | 8.893    | 12205         | 2628        | 0.146672 [ug/mL] |
| 2 | Caftaric acid         | 5  | 13.197   | 3429          | 634         | 1.03460 [ug/mL]  |
| 3 | 4-Hydroxybenzoic acid | 5  | 16.723   | 3179          | 354         | N/A              |
| 4 | t-Cinnamic acid       | 5  | 35.960   | 3773          | 304         | N/A              |
| 5 | Carvacrol             | 5  | 44.240   | 1093          | 292         | N/A              |
| 6 | 3-Hydroxyflavone      | 5  | 45.403   | 717           | 166         | N/A              |
