# Supplementary material for: Untargeted Metabolomics Used to Describe the Chemical Composition, Antioxidant and Antimicrobial Effects of Extracts from Pleurotus spp. Mycelium Grown in Different Culture Media
Source: MDPI journal article supplement (doi:10.3390/antibiotics11111468), 2022-10-25
Supplement: s1 [file s1]

# Chromatogram

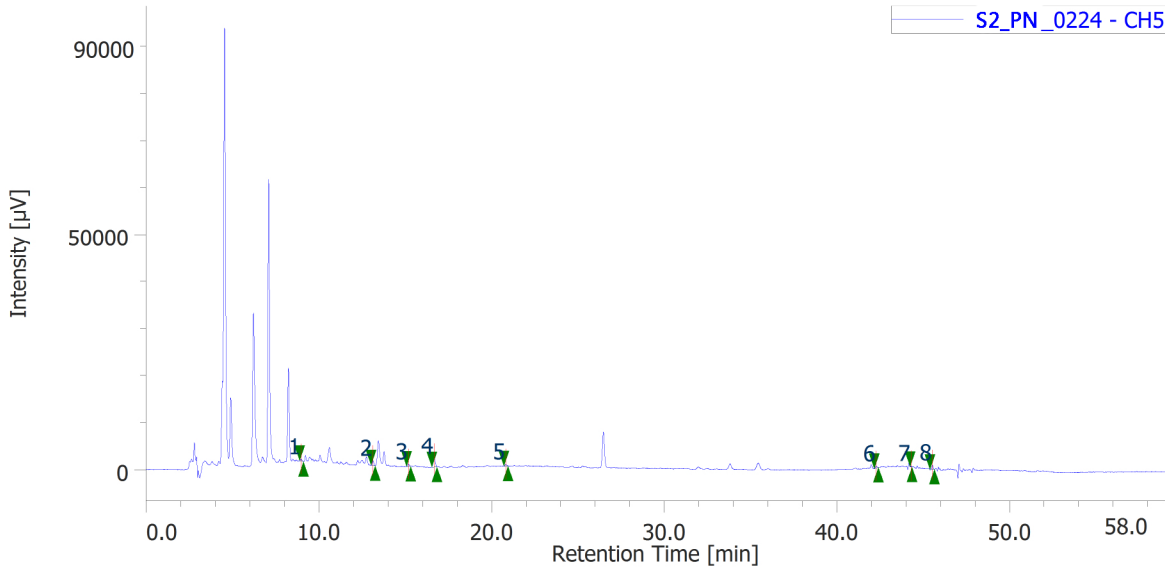

Chromatogram Information

|                        |                                       |
|------------------------|---------------------------------------|
| User Name              | Administrator                         |
| Date Modified          | 3/21/2022 10:35:59 AM                 |
| Description            |                                       |
| HPLC System Name       | HPLC2_DAD                             |
| Injection Date         | 2/26/2022 7:31:55 AM                  |
| Volume                 | 5.00 [µL]                             |
| Sample #               | 27                                    |
| Project Name           | Phenols_08_03_2022                    |
| Acquisition Time       | 59.0 [min]                            |
| Acquisition Sequence   |                                       |
| Control Method         |                                       |
| Peak ID Table          | PeakID_PhenolicCompound_18_02_2022_86 |
| Calibration Method     | Phenols_QUANT_CALIB_05_03_2022_Ch5-9  |
| Additional Information |                                       |

Channel & Peak Information Table

|                   |                                         |
|-------------------|-----------------------------------------|
| Chromatogram Name | S2_PN_0224-CH5                          |
| Sample Name       |                                         |
| Channel Name      | 254.0nm                                 |
| Sampling Interval | 200 [msec]                              |
| Peak Method       | PeakMethod_05_03_2022_Extracts (Manual) |

| # | Peak Name             | CH | tR [min] | Area [µV·sec] | Height [µV] | Quantity        |
|---|-----------------------|----|----------|---------------|-------------|-----------------|
| 1 | Gallic acid           | 5  | 8.977    | 2151          | 372         | N/A             |
| 2 | Caftaric acid         | 5  | 13.127   | 6124          | 1013        | 1.26610 [ug/mL] |
| 3 | Catechin              | 5  | 15.183   | 3259          | 441         | 3.49210 [ug/mL] |
| 4 | 4-Hydroxybenzoic acid | 5  | 16.670   | 14398         | 1706        | N/A             |
| 5 | Syringic acid         | 5  | 20.807   | 2479          | 337         | N/A             |
| 6 | Kaempferol            | 5  | 42.263   | 2795          | 403         | N/A             |
| 7 | Carvacrol             | 5  | 44.273   | 579           | 180         | N/A             |
| 8 | 3-Hydroxyflavone      | 5  | 45.520   | 4768          | 899         | N/A             |
