# Supplementary material for: Untargeted Metabolomics Used to Describe the Chemical Composition, Antioxidant and Antimicrobial Effects of Extracts from Pleurotus spp. Mycelium Grown in Different Culture Media
Source: MDPI journal article supplement (doi:10.3390/antibiotics11111468), 2022-10-25
Supplement: s1 [file s1]

# Chromatogram

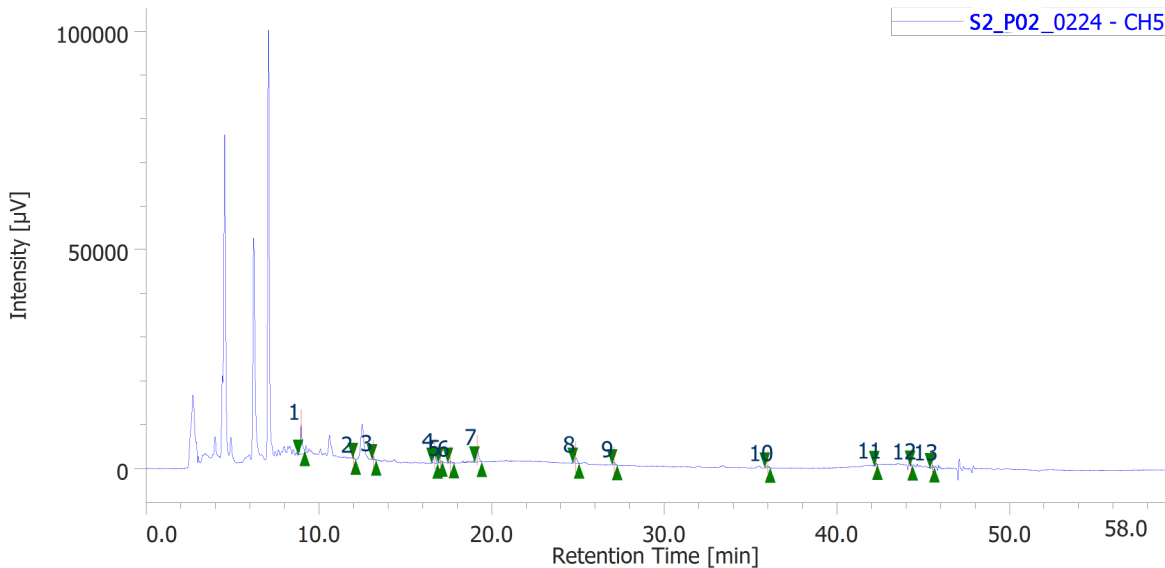

## Chromatogram Information

|                        |                                       |
|------------------------|---------------------------------------|
| User Name              | Administrator                         |
| Date Modified          | 3/21/2022 10:36:00 AM                 |
| Description            |                                       |
| HPLC System Name       | HPLC2_DAD                             |
| Injection Date         | 2/26/2022 10:33:24 AM                 |
| Volume                 | 5.00 [µL]                             |
| Sample #               | 30                                    |
| Project Name           | Phenols_08_03_2022                    |
| Acquisition Time       | 59.0 [min]                            |
| Acquisition Sequence   |                                       |
| Control Method         |                                       |
| Peak ID Table          | PeakID_PhenolicCompound_18_02_2022_86 |
| Calibration Method     | Phenols_QUANT_CALIB_05_03_2022_Ch5-9  |
| Additional Information |                                       |

## Channel & Peak Information Table

|                   |                                         |
|-------------------|-----------------------------------------|
| Chromatogram Name | S2_P02_0224-CH5                         |
| Sample Name       |                                         |
| Channel Name      | 254.0nm                                 |
| Sampling Interval | 200 [msec]                              |
| Peak Method       | PeakMethod_05_03_2022_Extracts (Manual) |

| #  | Peak Name             | CH | tR [min] | Area [µV-sec] | Height [µV] | Quantity          |
|----|-----------------------|----|----------|---------------|-------------|-------------------|
| 1  | Gallic acid           | 5  | 8.960    | 49797         | 6701        | 2.53289 [ug/mL]   |
| 2  | 3-Hydroxytyrosol      | 5  | 12.013   | 1107          | 222         | 0.0297715 [ug/mL] |
| 3  | Caftaric acid         | 5  | 13.150   | 4471          | 793         | 1.12407 [ug/mL]   |
| 4  | 4-Hydroxybenzoic acid | 5  | 16.897   | 17645         | 2059        | N/A               |
| 5  | Loganic acid          | 5  | 17.060   | 2617          | 311         | N/A               |
| 6  | Chlorogenic acid      | 5  | 17.583   | 4160          | 340         | 0.110922 [ug/mL]  |
| 7  | Vanillic acid         | 5  | 19.173   | 26247         | 2688        | N/A               |
| 8  | t-Ferulic acid        | 5  | 24.877   | 14151         | 1326        | 0.181858 [ug/mL]  |
| 9  | Benzoic acid          | 5  | 27.073   | 4747          | 553         | 1.90835 [ug/mL]   |
| 10 | t-Cinnamic acid       | 5  | 35.997   | 4315          | 378         | N/A               |
| 11 | Kaempferol            | 5  | 42.260   | 2665          | 442         | N/A               |
| 12 | Carvacrol             | 5  | 44.280   | 1202          | 313         | N/A               |
| 13 | 3-Hydroxyflavone      | 5  | 45.527   | 3337          | 587         | N/A               |
