# Supplementary material for: Untargeted Metabolomics Used to Describe the Chemical Composition, Antioxidant and Antimicrobial Effects of Extracts from Pleurotus spp. Mycelium Grown in Different Culture Media
Source: MDPI journal article supplement (doi:10.3390/antibiotics11111468), 2022-10-25
Supplement: s1 [file s1]

# Chromatogram

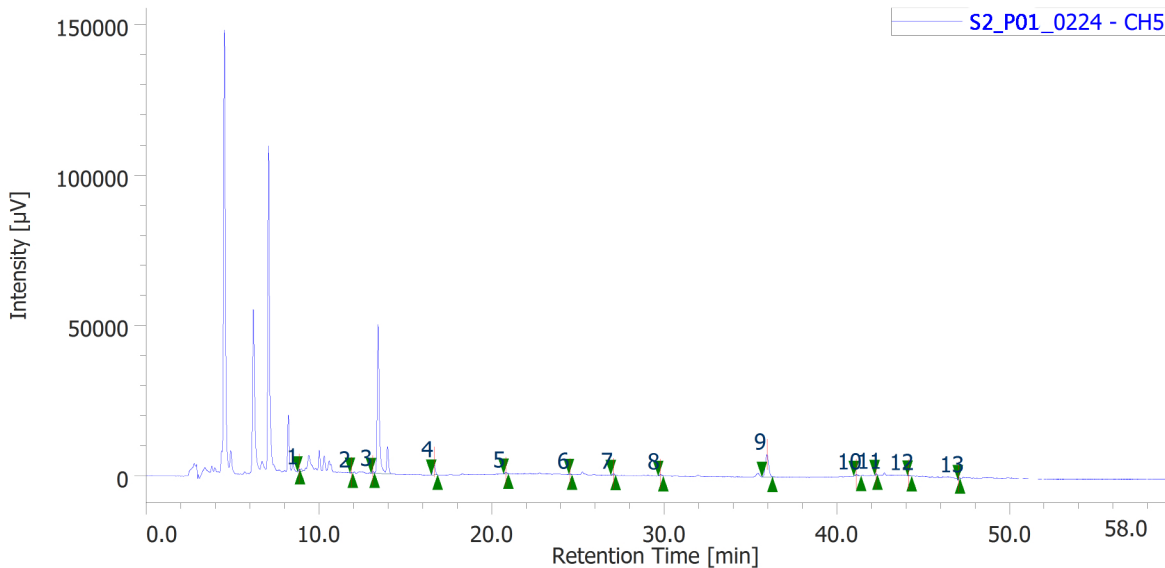

## Chromatogram Information

User NameAdministrator

Date Modified3/21/2022 10:35:59 AM

DescriptionHPLC2\_DAD

HPLC System Name2/26/2022 6:31:26 AM

Injection Date5.00 [µL]

Volume26

Sample #Phenols\_08\_03\_2022

Project Name59.0 [min]

Acquisition Time

Acquisition Sequence

Control Method

Peak ID TablePeakID\_PhenolicCompound\_18\_02\_2022\_86

Calibration MethodPhenols\_QUANT\_CALIB\_05\_03\_2022\_Ch5-9

Additional Information

## Channel & Peak Information Table

Chromatogram NameS2\_P01\_0224-CH5

Sample Name

Channel Name254.0nm

Sampling Interval200 [msec]

Peak MethodPeakMethod\_05\_03\_2022\_Extracts (Manual)

| #  | Peak Name             | CH | tR [min] | Area [µV-sec] | Height [µV] | Quantity        |
|----|-----------------------|----|----------|---------------|-------------|-----------------|
| 1  | Gallic acid           | 5  | 8.863    | 3673          | 754         | N/A             |
| 2  | 3-Hydroxytyrosol      | 5  | 11.873   | 726           | 152         | N/A             |
| 3  | Caftaric acid         | 5  | 13.123   | 5261          | 886         | 1.19200 [ug/mL] |
| 4  | 4-Hydroxybenzoic acid | 5  | 16.663   | 36260         | 4166        | N/A             |
| 5  | Syringic acid         | 5  | 20.823   | 4948          | 529         | N/A             |
| 6  | t-Ferulic acid        | 5  | 24.543   | 1276          | 208         | N/A             |
| 7  | Benzoic acid          | 5  | 27.057   | 4107          | 506         | 1.67374 [ug/mL] |
| 8  | Rosmarinic acid       | 5  | 29.777   | 5920          | 640         | N/A             |
| 9  | t-Cinnamic acid       | 5  | 35.940   | 101844        | 7536        | 1.33915 [ug/mL] |
| 10 | Hesperetin            | 5  | 41.110   | 6719          | 606         | 2.03236 [ug/mL] |
| 11 | Kaempferol            | 5  | 42.267   | 2479          | 477         | N/A             |
| 12 | Carvacrol             | 5  | 44.143   | 2056          | 356         | N/A             |
| 13 | Emodin                | 5  | 47.053   | 3336          | 807         | N/A             |
