# Supplementary material for: Untargeted Metabolomics Used to Describe the Chemical Composition, Antioxidant and Antimicrobial Effects of Extracts from Pleurotus spp. Mycelium Grown in Different Culture Media
Source: MDPI journal article supplement (doi:10.3390/antibiotics11111468), 2022-10-25
Supplement: s1 [file s1]

# Chromatogram

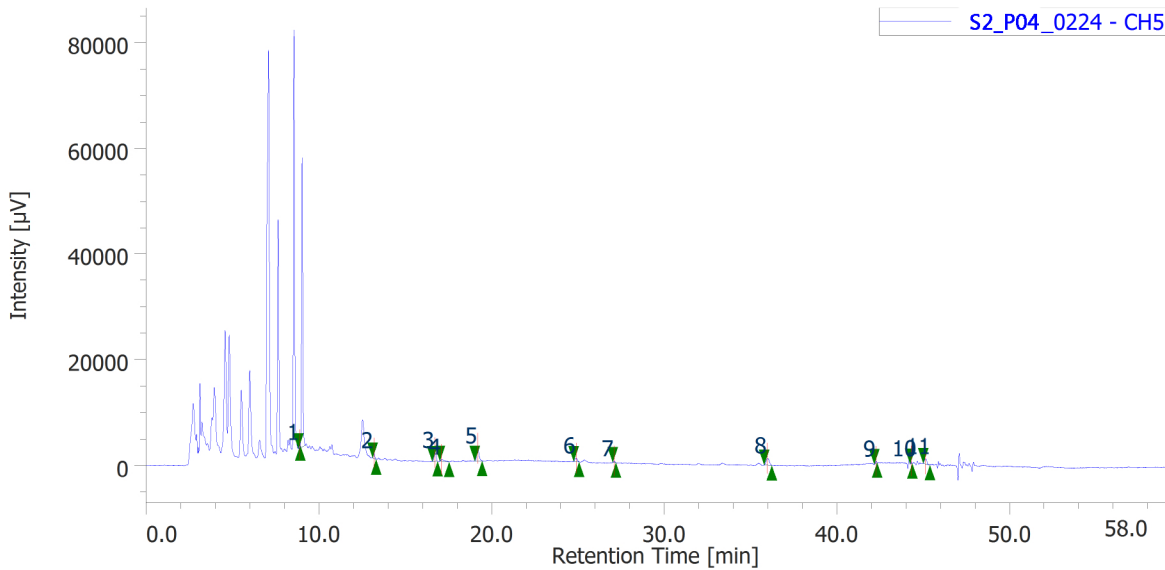

## Chromatogram Information

|                        |                                       |
|------------------------|---------------------------------------|
| User Name              | Administrator                         |
| Date Modified          | 3/21/2022 10:36:01 AM                 |
| Description            |                                       |
| HPLC System Name       | HPLC2_DAD                             |
| Injection Date         | 2/26/2022 1:34:50 PM                  |
| Volume                 | 5.00 [μL]                             |
| Sample #               | 32                                    |
| Project Name           | Phenols_08_03_2022                    |
| Acquisition Time       | 59.0 [min]                            |
| Acquisition Sequence   |                                       |
| Control Method         |                                       |
| Peak ID Table          | PeakID_PhenolicCompound_18_02_2022_86 |
| Calibration Method     | Phenols_QUANT_CALIB_05_03_2022_Ch5-9  |
| Additional Information |                                       |

## Channel & Peak Information Table

|                   |                                         |
|-------------------|-----------------------------------------|
| Chromatogram Name | S2_P04_0224-CH5                         |
| Sample Name       |                                         |
| Channel Name      | 254.0nm                                 |
| Sampling Interval | 200 [msec]                              |
| Peak Method       | PeakMethod_05_03_2022_Extracts (Manual) |

| #  | Peak Name             | CH | tR [min] | Area [μV-sec] | Height [μV] | Quantity         |
|----|-----------------------|----|----------|---------------|-------------|------------------|
| 1  | Gallic acid           | 5  | 8.893    | 1960          | 560         | N/A              |
| 2  | Caftaric acid         | 5  | 13.180   | 5435          | 993         | 1.20690 [ug/mL]  |
| 3  | 4-Hydroxybenzoic acid | 5  | 16.713   | 13309         | 1599        | N/A              |
| 4  | Loganic acid          | 5  | 17.097   | 5500          | 349         | N/A              |
| 5  | Vanillic acid         | 5  | 19.197   | 22165         | 2365        | N/A              |
| 6  | t-Ferulic acid        | 5  | 24.890   | 6368          | 643         | N/A              |
| 7  | Benzoic acid          | 5  | 27.097   | 1512          | 224         | 0.722938 [ug/mL] |
| 8  | t-Cinnamic acid       | 5  | 35.960   | 16870         | 1313        | N/A              |
| 9  | Kaempferol            | 5  | 42.260   | 1660          | 306         | N/A              |
| 10 | Carvacrol             | 5  | 44.280   | 1881          | 486         | N/A              |
| 11 | Flavone               | 5  | 45.097   | 9898          | 906         | N/A              |
