# Supplementary material for: Untargeted Metabolomics Used to Describe the Chemical Composition, Antioxidant and Antimicrobial Effects of Extracts from Pleurotus spp. Mycelium Grown in Different Culture Media
Source: MDPI journal article supplement (doi:10.3390/antibiotics11111468), 2022-10-25
Supplement: s1 [file s1]

# Chromatogram

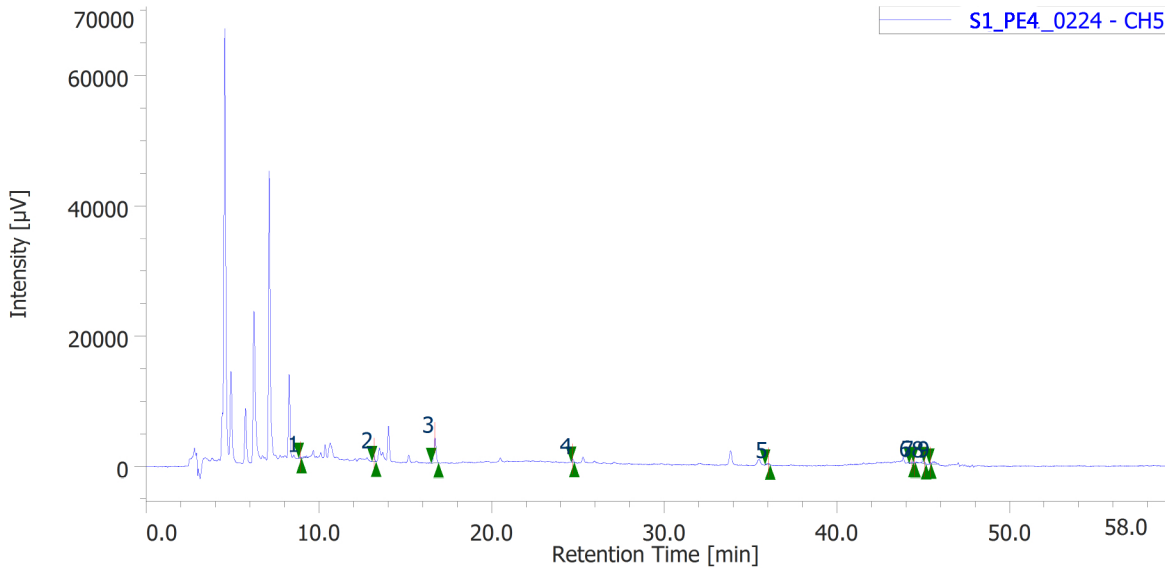

Chromatogram Information

|                        |                                       |
|------------------------|---------------------------------------|
| User Name              | Administrator                         |
| Date Modified          | 3/15/2022 9:47:08 AM                  |
| Description            |                                       |
| HPLC System Name       | HPLC2_DAD                             |
| Injection Date         | 2/26/2022 12:28:29 AM                 |
| Volume                 | 5.00 [μL]                             |
| Sample #               | 21                                    |
| Project Name           | Phenols_08_03_2022                    |
| Acquisition Time       | 59.0 [min]                            |
| Acquisition Sequence   |                                       |
| Control Method         |                                       |
| Peak ID Table          | PeakID_PhenolicCompound_18_02_2022_86 |
| Calibration Method     | Phenols_QUANT_CALIB_05_03_2022_Ch5-9  |
| Additional Information |                                       |

Channel & Peak Information Table

|                   |                                         |
|-------------------|-----------------------------------------|
| Chromatogram Name | S1_PE4_0224-CH5                         |
| Sample Name       |                                         |
| Channel Name      | 254.0nm                                 |
| Sampling Interval | 200 [msec]                              |
| Peak Method       | PeakMethod_05_03_2022_Extracts (Manual) |

| # | Peak Name             | CH | tR [min] | Area [μV·sec] | Height [μV] | Quantity        |
|---|-----------------------|----|----------|---------------|-------------|-----------------|
| 1 | Gallic acid           | 5  | 8.907    | 1260          | 208         | N/A             |
| 2 | Caftaric acid         | 5  | 13.170   | 7826          | 1256        | 1.41233 [ug/mL] |
| 3 | 4-Hydroxybenzoic acid | 5  | 16.717   | 34147         | 3846        | N/A             |
| 4 | t-Ferulic acid        | 5  | 24.693   | 2545          | 462         | N/A             |
| 5 | t-Cinnamic acid       | 5  | 36.013   | 2678          | 255         | N/A             |
| 6 | Carvacrol             | 5  | 44.340   | 2205          | 257         | N/A             |
| 7 | Thymol                | 5  | 44.463   | 1300          | 220         | N/A             |
| 8 | Flavone               | 5  | 45.070   | 1435          | 261         | N/A             |
| 9 | 3-Hydroxyflavone      | 5  | 45.403   | 1005          | 249         | N/A             |
