# Supplementary material for: Untargeted Metabolomics Used to Describe the Chemical Composition, Antioxidant and Antimicrobial Effects of Extracts from Pleurotus spp. Mycelium Grown in Different Culture Media
Source: MDPI journal article supplement (doi:10.3390/antibiotics11111468), 2022-10-25
Supplement: s1 [file s1]

# Chromatogram

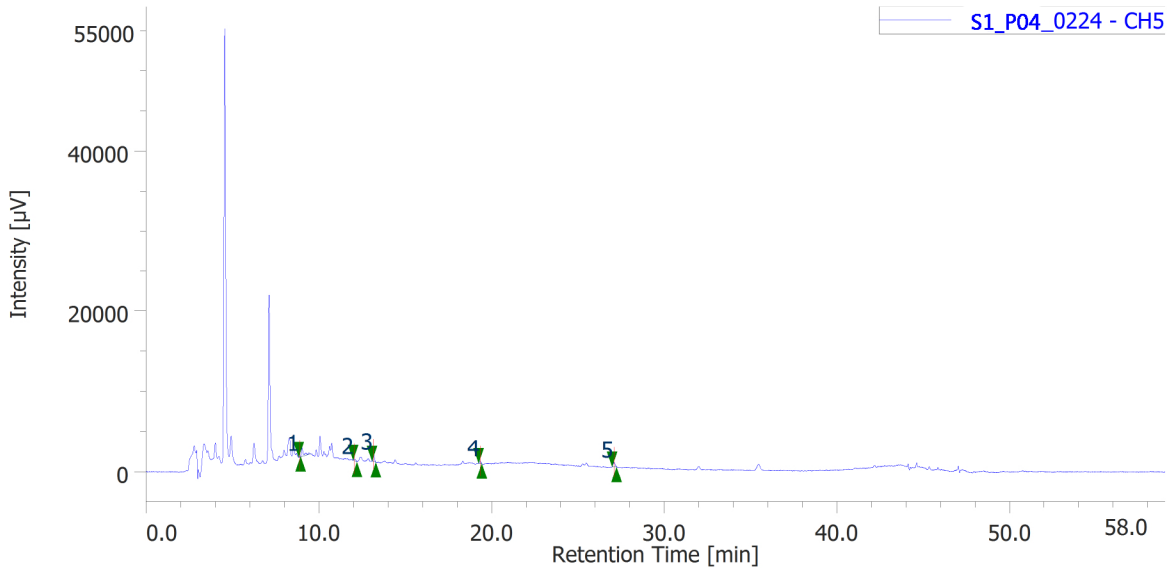

Chromatogram Information

User NameAdministrator

Date Modified3/14/2022 11:29:05 AM

Description

HPLC System NameHPLC2\_DAD

Injection Date2/25/2022 11:27:59 PM

Volume5.00 [µL]

Sample #20

Project NamePhenols\_08\_03\_2022

Acquisition Time59.0 [min]

Acquisition Sequence

Control Method

Peak ID TablePeakID\_PhenolicCompound\_18\_02\_2022\_86

Calibration MethodPhenols\_QUANT\_CALIB\_05\_03\_2022\_Ch5-9

Additional Information

Channel & Peak Information Table

Chromatogram NameS1\_P04\_0224-CH5

Sample Name

Channel Name254.0nm

Sampling Interval200 [msec]

Peak MethodPeakMethod\_05\_03\_2022\_Extracts (Manual)

| # | Peak Name        | CH | tR [min] | Area [µV·sec] | Height [µV] | Quantity         |
|---|------------------|----|----------|---------------|-------------|------------------|
| 1 | Gallic acid      | 5  | 8.897    | 543           | 129         | N/A              |
| 2 | 3-Hydroxytyrosol | 5  | 12.047   | 1987          | 238         | 0.451178 [ug/mL] |
| 3 | Caftaric acid    | 5  | 13.167   | 4888          | 863         | 1.15996 [ug/mL]  |
| 4 | Vanillic acid    | 5  | 19.333   | 1812          | 299         | N/A              |
| 5 | Benzoic acid     | 5  | 27.090   | 4653          | 569         | 1.87404 [ug/mL]  |
