# Supplementary material for: Untargeted Metabolomics Used to Describe the Chemical Composition, Antioxidant and Antimicrobial Effects of Extracts from Pleurotus spp. Mycelium Grown in Different Culture Media
Source: MDPI journal article supplement (doi:10.3390/antibiotics11111468), 2022-10-25
Supplement: s1 [file s1]

Chromatogram

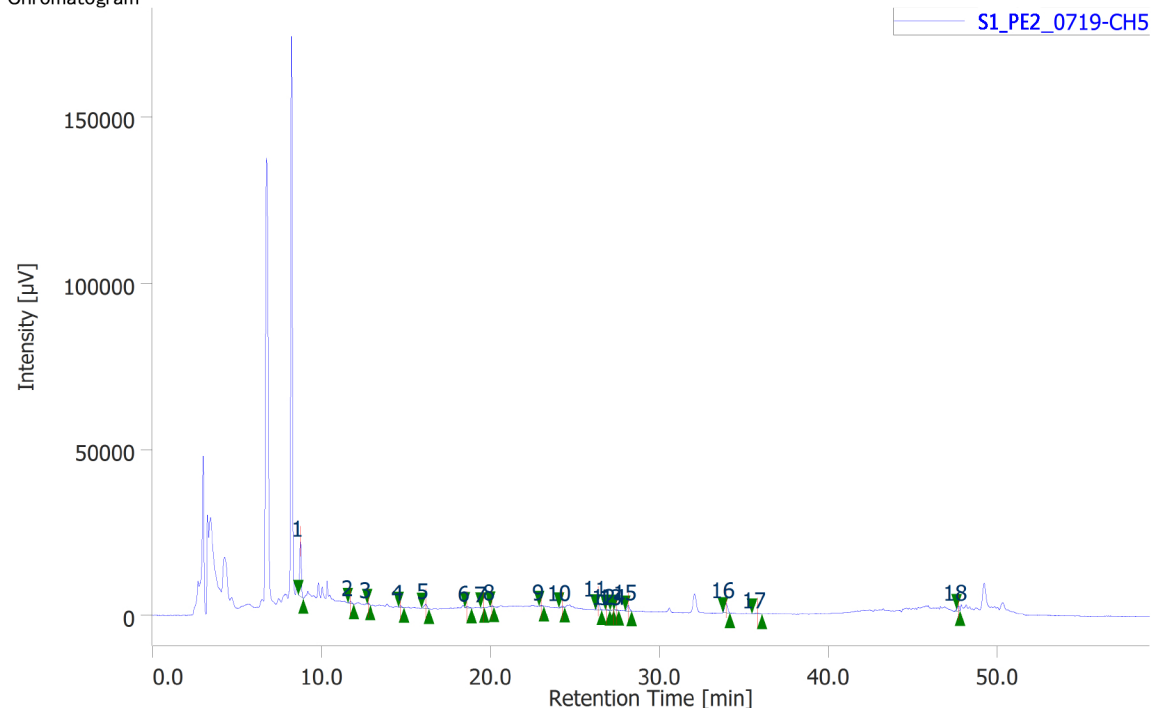

## Peak Information

| #  | Peak Name             | CH | tR [min] | Area [μV·sec] | Height [μV] | Area%  | Height% | Quantity         | Resolution |
|----|-----------------------|----|----------|---------------|-------------|--------|---------|------------------|------------|
| 1  | Gallic acid           | 5  | 8.753    | 107234        | 16507       | 44.681 | 54.836  | 6.17875 [ug/mL]  | 15.117     |
| 2  | 3-Hydroxytyrosol      | 5  | 11.717   | 5969          | 660         | 2.487  | 2.194   | 2.35742 [ug/mL]  | 5.910      |
| 3  | Caftaric acid         | 5  | 12.777   | 2378          | 465         | 0.991  | 1.544   | 0.944342 [ug/mL] | 10.874     |
| 4  | Catechin              | 5  | 14.687   | 3875          | 465         | 1.614  | 1.546   | 4.09636 [ug/mL]  | 5.773      |
| 5  | 4-Hydroxybenzoic acid | 5  | 16.173   | 15166         | 1349        | 6.319  | 4.482   | N/A              | 7.248      |
| 6  | Vanillic acid         | 5  | 18.607   | 4403          | 361         | 1.835  | 1.199   | N/A              | 3.959      |
| 7  | Epicatechin           | 5  | 19.567   | 376           | 88          | 0.157  | 0.291   | N/A              | 3.719      |
| 8  | Syringic acid         | 5  | 20.103   | 2504          | 403         | 1.043  | 1.340   | N/A              | 12.884     |
| 9  | p-Coumaric acid       | 5  | 23.007   | 2595          | 278         | 1.081  | 0.925   | N/A              | 4.633      |
| 10 | t-Ferulic acid        | 5  | 24.247   | 4016          | 418         | 1.673  | 1.388   | N/A              | 8.483      |
| 11 | Benzoic acid          | 5  | 26.367   | 22727         | 2469        | 9.470  | 8.203   | 8.49870 [ug/mL]  | 1.973      |
| 12 | Hyperoside            | 5  | 26.883   | 1081          | 118         | 0.450  | 0.392   | N/A              | 1.287      |
| 13 | Rutin                 | 5  | 27.260   | 75            | 15          | 0.031  | 0.049   | N/A              | 0.683      |
| 14 | Isoquercetin          | 5  | 27.460   | 1794          | 209         | 0.748  | 0.695   | N/A              | 2.614      |
| 15 | Resveratrol           | 5  | 28.150   | 15835         | 1677        | 6.598  | 5.570   | 1.91416 [ug/mL]  | 20.250     |
| 16 | t-Cinnamic acid       | 5  | 33.933   | 34095         | 2889        | 14.206 | 9.597   | N/A              | 4.405      |
| 17 | Quercetin             | 5  | 35.793   | 3574          | 202         | 1.489  | 0.672   | 0.848927 [ug/mL] | 31.413     |
| 18 | Emodin                | 5  | 47.683   | 12304         | 1528        | 5.127  | 5.077   | N/A              | N/A        |
