# Supplementary material for: Untargeted Metabolomics Used to Describe the Chemical Composition, Antioxidant and Antimicrobial Effects of Extracts from Pleurotus spp. Mycelium Grown in Different Culture Media
Source: MDPI journal article supplement (doi:10.3390/antibiotics11111468), 2022-10-25
Supplement: s1 [file s1]

# Chromatogram

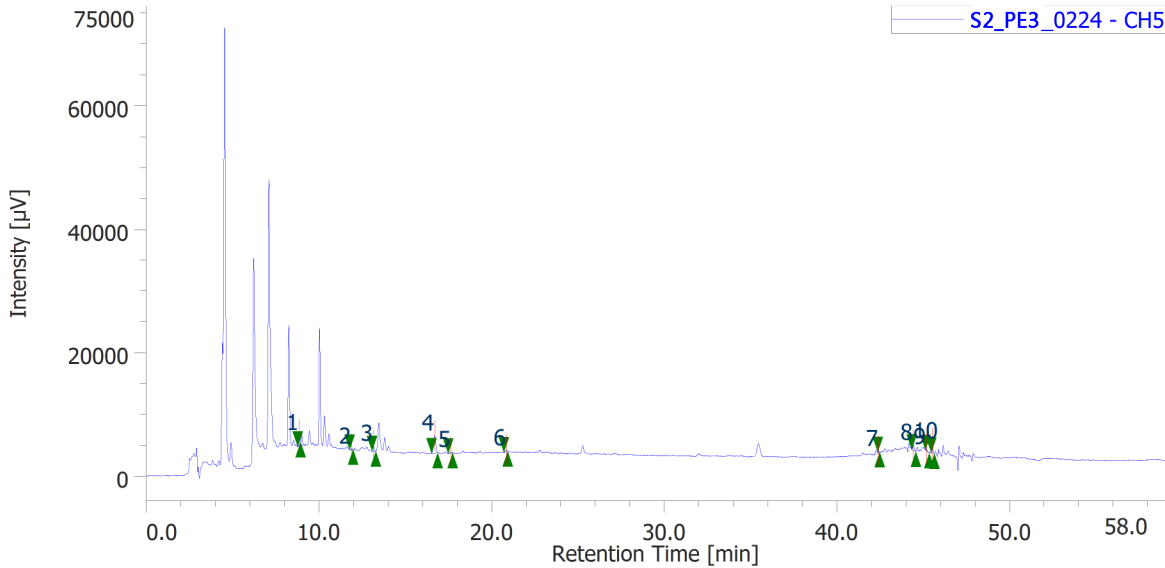

Chromatogram Information

|                        |                                       |
|------------------------|---------------------------------------|
| User Name              | Administrator                         |
| Date Modified          | 3/21/2022 10:36:00 AM                 |
| Description            |                                       |
| HPLC System Name       | HPLC2_DAD                             |
| Injection Date         | 2/26/2022 9:32:54 AM                  |
| Volume                 | 5.00 [μL]                             |
| Sample #               | 29                                    |
| Project Name           | Phenols_08_03_2022                    |
| Acquisition Time       | 59.0 [min]                            |
| Acquisition Sequence   |                                       |
| Control Method         |                                       |
| Peak ID Table          | PeakID_PhenolicCompound_18_02_2022_86 |
| Calibration Method     | Phenols_QUANT_CALIB_05_03_2022_Ch5-9  |
| Additional Information |                                       |

Channel & Peak Information Table

|                   |                                         |
|-------------------|-----------------------------------------|
| Chromatogram Name | S2_PE3.0224-CH5                         |
| Sample Name       |                                         |
| Channel Name      | 254.0nm                                 |
| Sampling Interval | 200 [msec]                              |
| Peak Method       | PeakMethod_05_03_2022_Extracts (Manual) |

| #  | Peak Name             | CH | tR [min] | Area [μV-sec] | Height [μV] | Quantity          |
|----|-----------------------|----|----------|---------------|-------------|-------------------|
| 1  | Gallic acid           | 5  | 8.867    | 9860          | 1838        | N/A               |
| 2  | 3-Hydroxytyrosol      | 5  | 11.893   | 1596          | 233         | 0.263805 [ug/mL]  |
| 3  | Caftaric acid         | 5  | 13.153   | 4955          | 889         | 1.16567 [ug/mL]   |
| 4  | 4-Hydroxybenzoic acid | 5  | 16.693   | 24889         | 2830        | N/A               |
| 5  | Chlorogenic acid      | 5  | 17.643   | 1545          | 208         | N/A               |
| 6  | Syringic acid         | 5  | 20.847   | 1900          | 266         | N/A               |
| 7  | Kaempferol            | 5  | 42.413   | 1127          | 238         | N/A               |
| 8  | Thymol                | 5  | 44.413   | 4977          | 856         | 0.0354455 [ug/mL] |
| 9  | Flavone               | 5  | 45.170   | 1295          | 280         | N/A               |
| 10 | 3-Hydroxyflavone      | 5  | 45.527   | 6941          | 1618        | N/A               |
