# Supplementary material for: Untargeted Metabolomics Used to Describe the Chemical Composition, Antioxidant and Antimicrobial Effects of Extracts from Pleurotus spp. Mycelium Grown in Different Culture Media
Source: MDPI journal article supplement (doi:10.3390/antibiotics11111468), 2022-10-25
Supplement: s1 [file s1]

# Chromatogram

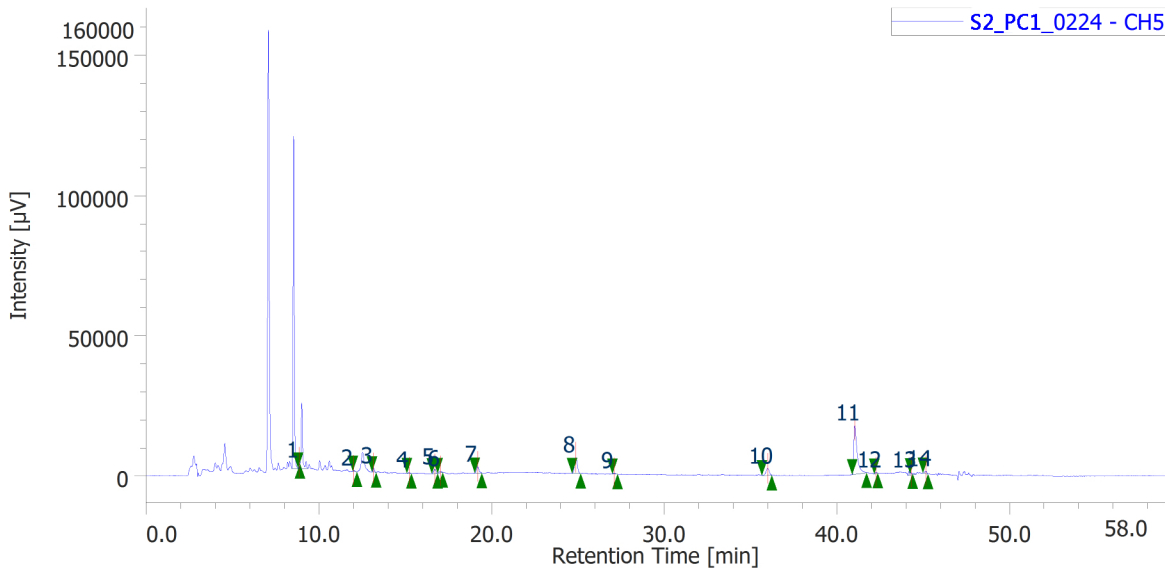

## Chromatogram Information

User Name Administrator  
Date Modified 3/21/2022 10:35:59 AM  
Description HPLC2\_DAD  
HPLC System Name 2/26/2022 3:29:57 AM  
Injection Date 5.00 [μL]  
Volume 24  
Sample # Phenols\_08\_03\_2022  
Project Name Acquisition Time 59.0 [min]  
Acquisition Sequence  
Control Method  
Peak ID Table PeakID\_PhenolicCompound\_18\_02\_2022\_86  
Calibration Method Phenols\_QUANT\_CALIB\_05\_03\_2022\_Ch5-9  
Additional Information

## Channel & Peak Information Table

Chromatogram Name S2\_PC1\_0224-CH5  
Sample Name 254.0nm  
Channel Name 200 [msec]  
Sampling Interval PeakMethod\_05\_03\_2022\_Extracts (Manual)  
Peak Method

| #  | Peak Name             | CH | tR [min] | Area [μV-sec] | Height [μV] | Quantity         |
|----|-----------------------|----|----------|---------------|-------------|------------------|
| 1  | Gallic acid           | 5  | 8.863    | 9268          | 2180        | N/A              |
| 2  | 3-Hydroxytyrosol      | 5  | 12.013   | 2536          | 350         | 0.713875 [ug/mL] |
| 3  | Caftaric acid         | 5  | 13.163   | 8097          | 1401        | 1.43557 [ug/mL]  |
| 4  | Catechin              | 5  | 15.210   | 2470          | 317         | 2.71687 [ug/mL]  |
| 5  | 4-Hydroxybenzoic acid | 5  | 16.703   | 13160         | 1556        | N/A              |
| 6  | Loganic acid          | 5  | 17.040   | 5723          | 574         | N/A              |
| 7  | Vanillic acid         | 5  | 19.187   | 22164         | 2301        | N/A              |
| 8  | t-Ferulic acid        | 5  | 24.880   | 63077         | 5649        | 3.09358 [ug/mL]  |
| 9  | Benzoic acid          | 5  | 27.087   | 3249          | 374         | 1.35952 [ug/mL]  |
| 10 | t-Cinnamic acid       | 5  | 35.973   | 31863         | 2374        | N/A              |
| 11 | Hesperetin            | 5  | 41.023   | 231862        | 17400       | 16.5416 [ug/mL]  |
| 12 | Kaempferol            | 5  | 42.257   | 2683          | 420         | N/A              |
| 13 | Carvacrol             | 5  | 44.273   | 5486          | 852         | N/A              |
| 14 | Flavone               | 5  | 45.153   | 7627          | 875         | N/A              |
