# Supplementary material for: Untargeted Metabolomics Used to Describe the Chemical Composition, Antioxidant and Antimicrobial Effects of Extracts from Pleurotus spp. Mycelium Grown in Different Culture Media
Source: MDPI journal article supplement (doi:10.3390/antibiotics11111468), 2022-10-25
Supplement: s1 [file s1]

## Chromatogram

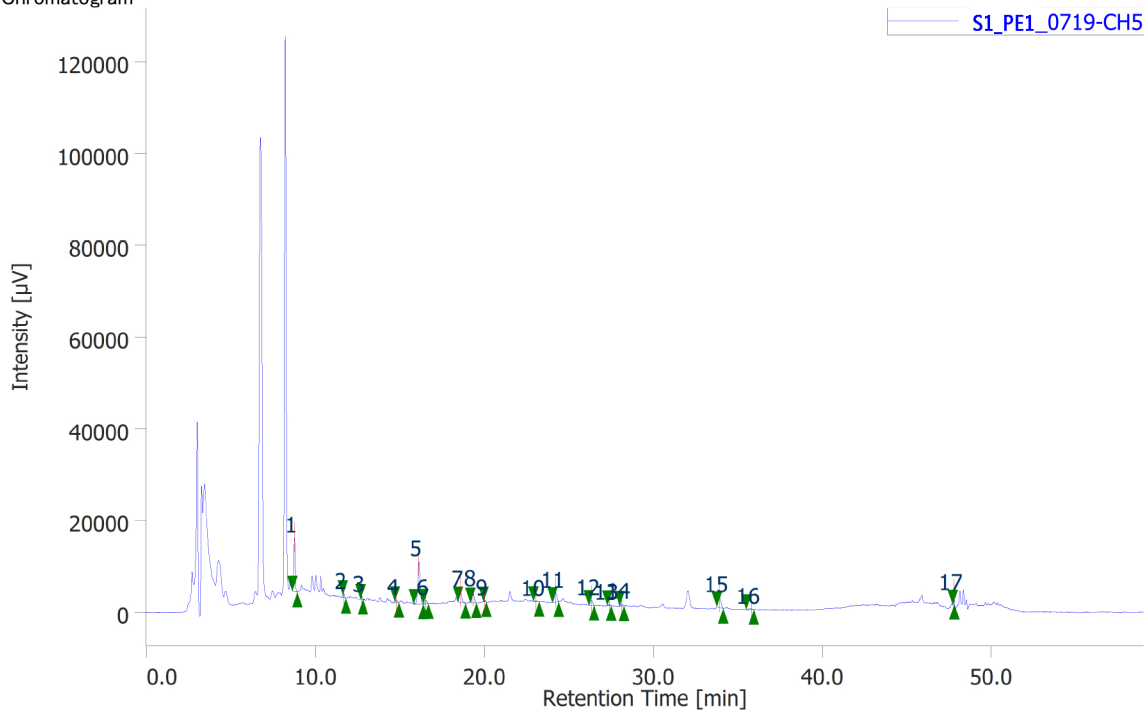

## Peak Information

| #  | Peak Name             | CH | tR [min] | Area [μV·sec] | Height [μV] | Area%  | Height% | Quantity         | Resolution |
|----|-----------------------|----|----------|---------------|-------------|--------|---------|------------------|------------|
| 1  | Gallic acid           | 5  | 8.750    | 68217         | 11788       | 23.454 | 30.789  | 3.70209 [ug/mL]  | N/A        |
| 2  | 3-Hydroxytyrosol      | 5  | 11.680   | 5261          | 898         | 1.809  | 2.346   | 2.01849 [ug/mL]  | N/A        |
| 3  | Caftaric acid         | 5  | 12.737   | 3167          | 628         | 1.089  | 1.641   | 1.01208 [ug/mL]  | 11.891     |
| 4  | Catechin              | 5  | 14.773   | 4338          | 629         | 1.491  | 1.643   | 4.55133 [ug/mL]  | 6.168      |
| 5  | 4-Hydroxybenzoic acid | 5  | 16.120   | 83859         | 9354        | 28.832 | 24.430  | 0.161037 [ug/mL] | 1.911      |
| 6  | Loganic acid          | 5  | 16.533   | 5696          | 756         | 1.958  | 1.975   | N/A              | 9.046      |
| 7  | Vanillic acid         | 5  | 18.583   | 23117         | 2382        | 7.948  | 6.221   | N/A              | 3.164      |
| 8  | Epicatechin           | 5  | 19.323   | 20434         | 2494        | 7.026  | 6.514   | 9.48965 [ug/mL]  | 3.628      |
| 9  | Syringic acid         | 5  | 20.013   | 2160          | 369         | 0.743  | 0.963   | N/A              | 15.095     |
| 10 | p-Coumaric acid       | 5  | 23.043   | 1472          | 158         | 0.506  | 0.412   | N/A              | 4.568      |
| 11 | t-Ferulic acid        | 5  | 24.220   | 20923         | 2029        | 7.194  | 5.300   | 0.584923 [ug/mL] | 8.073      |
| 12 | Benzoic acid          | 5  | 26.323   | 9852          | 1095        | 3.387  | 2.860   | 3.77952 [ug/mL]  | 4.622      |
| 13 | Isoquercetin          | 5  | 27.400   | 1608          | 204         | 0.553  | 0.534   | N/A              | 3.206      |
| 14 | Resveratrol           | 5  | 28.110   | 3887          | 507         | 1.336  | 1.325   | 0.564954 [ug/mL] | 21.921     |
| 15 | t-Cinnamic acid       | 5  | 33.900   | 25453         | 2268        | 8.751  | 5.924   | N/A              | 4.657      |
| 16 | Quercetin             | 5  | 35.783   | 2991          | 184         | 1.028  | 0.480   | 0.833611 [ug/mL] | 40.363     |
| 17 | Emodin                | 5  | 47.767   | 8419          | 2543        | 2.895  | 6.642   | N/A              | N/A        |
