# Supplementary material for: Untargeted Metabolomics Used to Describe the Chemical Composition, Antioxidant and Antimicrobial Effects of Extracts from Pleurotus spp. Mycelium Grown in Different Culture Media
Source: MDPI journal article supplement (doi:10.3390/antibiotics11111468), 2022-10-25
Supplement: s1 [file s1]

**Table S1.** Preparation of mycelium extracts obtained from medium S1.

| <b>Sample ID</b> | <b>Lyophilised mycelia</b> | <b>Final concentration</b>   |
|------------------|----------------------------|------------------------------|
|                  | <b>weight (g)</b>          | <b>(mg ml<sup>-1</sup> )</b> |
| <b>PC1</b>       | 0.0375                     | 10                           |
| <b>PE1</b>       | 0.0179                     | 10                           |
| <b>PO1</b>       | 0.0232                     | 10                           |
| <b>PN</b>        | 0.0434                     | 10                           |
| <b>PE2</b>       | 0.0222                     | 10                           |
| <b>PE3</b>       | 0.0326                     | 10                           |
| <b>PO2</b>       | 0.0423                     | 10                           |
| <b>PO3</b>       | 0.0407                     | 10                           |
| <b>PO4</b>       | 0.0415                     | 10                           |
| <b>PE4</b>       | 0.0573                     | 10                           |
| <b>PO5</b>       | 0.0503                     | 10                           |
| <b>PO6</b>       | 0.042                      | 10                           |

**Table S2.** Preparation of mycelium extracts obtained from medium S2.

|                  | <b>Lyophilised mycelia<br/>weight (g)</b> | <b>Final concentration<br/>(mg ml<sup>-1</sup> )</b> |
|------------------|-------------------------------------------|------------------------------------------------------|
| <b>Sample ID</b> |                                           |                                                      |
| <b>PC1</b>       | 0.0654                                    | 10                                                   |
| <b>PE1</b>       | 0.0813                                    | 10                                                   |
| <b>PO1</b>       | 0.028                                     | 10                                                   |
| <b>PN</b>        | 0.0419                                    | 10                                                   |
| <b>PE2</b>       | 0.0268                                    | 10                                                   |
| <b>PE3</b>       | 0.0328                                    | 10                                                   |
| <b>PO2</b>       | 0.0343                                    | 10                                                   |
| <b>PO3</b>       | 0.0387                                    | 10                                                   |
| <b>PO4</b>       | 0.0347                                    | 10                                                   |
| <b>PE4</b>       | 0.1036                                    | 10                                                   |
| <b>PO5</b>       | 0.0457                                    | 10                                                   |
| <b>PO6</b>       | 0.0321                                    | 10                                                   |

| Peak Name             | S1       | PC1     | S1       | PE1      | S1       | PO1     | S1       | PN      | S1      | PE2     | S1       | PE3     | S1       | PO2     | S1       | PO3     | S1      | PO4     | S1      | PE4      | S1       | PO5      | S1       | PO6      | S2 | PC1 | S2 | PE1      | S2      | PO1    | S2       | PNS | S2 | PE2 | S2 | PE3 | S2 | PO2 | S2 | PO3 | S2 | PO4      | S2      | PE4      | S2 | PO5 | S2        | PO6      |  |
|-----------------------|----------|---------|----------|----------|----------|---------|----------|---------|---------|---------|----------|---------|----------|---------|----------|---------|---------|---------|---------|----------|----------|----------|----------|----------|----|-----|----|----------|---------|--------|----------|-----|----|-----|----|-----|----|-----|----|-----|----|----------|---------|----------|----|-----|-----------|----------|--|
| Gallic acid           | 0        |         | 3.70209  | 0.146672 | 0        |         | 6.17875  | 0       | 0       |         | 0        | 0       | 0        | 0       | 0        | 0       | 0       | 0       | 0       | 0        | 0        | 0        | 0        | 0        | 0  | 0   | 0  | 0        | 0       | 0      | 0        | 0   | 0  | 0   | 0  | 0   | 0  | 0   | 0  | 0   | 0  | 0.951539 | 5.20839 | 0.236166 |    |     |           |          |  |
| 3-Hydroxytyrosol      | 0        |         | 2.01849  |          | 0        |         | 2.35742  |         | 0       |         | 0.451178 |         | 0.894321 | 1.56411 | 0.713875 | 0       |         | 0       |         | 0.305922 | 0.263805 | 0.029771 | 50.15042 |          |    |     |    | 0.034176 | 1.08113 |        |          |     |    |     |    |     |    |     |    |     |    |          |         |          |    |     |           |          |  |
| Caftaric acid         | 1.13593  | 1.01208 | 1.0346   | 1.51619  | 0.944234 | 1.21918 | 0.865307 | 1.47035 | 1.15996 | 1.41233 | 1.05835  | 1.09248 | 0.43557  | 1.19602 | 1.192    | 1.2661  | 1.16101 | 1.16567 | 1.12407 | 1.44894  | 1.2069   | 0.908978 | 1.14813  | 0.888139 |    |     |    |          |         |        |          |     |    |     |    |     |    |     |    |     |    |          |         |          |    |     |           |          |  |
| Catechin              |          |         | 4.55133  |          |          |         | 4.09636  |         |         |         |          |         |          |         |          | 1.86523 | 2.71668 | 3.15742 |         |          |          |          |          |          |    |     |    |          |         | 3.4921 |          |     |    |     |    |     |    |     |    |     |    |          |         |          |    |     |           |          |  |
| 4-Hydroxybenzoic acid | 0        |         | 0.161037 | 0        | 0        |         | 0        | 0       |         | 0       | 0        | 0       | 0        | 0       | 0        | 0       | 0       | 0       | 0       | 0        | 0        | 0        | 0        | 0        | 0  | 0   | 0  | 0        | 0       | 0      | 0        | 0   | 0  | 0   | 0  | 0   | 0  | 0   | 0  | 0   | 0  | 0        | 0       | 0        | 0  | 0   |           |          |  |
| Loganic acid          |          |         | 0        |          |          |         |          |         |         |         |          |         |          |         |          | 0       |         |         |         |          |          |          |          |          |    |     |    |          |         | 0      | 0        | 0   |    |     |    |     |    |     |    |     |    |          |         |          |    |     | 0.0359548 |          |  |
| Chlorogenic acid      |          |         |          |          |          |         |          |         |         |         |          |         |          |         |          |         |         |         |         |          |          |          |          |          |    |     |    |          | 0       | 0      | 0.110922 |     |    |     |    |     |    |     |    |     |    |          |         |          |    |     |           |          |  |
| Vanillic acid         | 0        | 0       |          |          | 0        |         | 0        |         | 0       |         | 0        |         |          |         |          | 0       |         |         |         |          |          |          |          |          |    |     |    |          |         | 0      |          |     |    |     |    |     |    |     |    |     |    |          |         | 0        | 0  |     |           |          |  |
| Caffeic acid          |          |         |          |          |          |         |          |         |         |         |          |         | 0        | 0       |          |         |         |         |         |          |          |          |          |          |    |     |    |          |         |        |          |     |    |     |    |     |    |     |    |     |    |          |         |          |    |     |           |          |  |
| Epicatechin           |          |         | 9.48965  |          | 0        |         |          |         |         |         |          |         |          |         |          |         |         |         |         |          |          |          |          |          |    |     |    |          |         |        |          |     |    |     |    |     |    |     |    |     |    |          |         |          |    |     |           |          |  |
| Syringic acid         |          |         | 0        |          | 0        |         |          |         |         |         |          |         |          |         |          |         |         |         |         |          |          |          |          |          |    |     |    | 0        | 0       | 0      | 0        |     |    |     |    |     |    |     |    |     |    |          |         |          |    |     |           |          |  |
| p-Coumaric acid       |          |         | 0        |          | 0        |         |          |         |         |         |          |         |          |         |          |         |         |         |         |          |          |          |          |          |    |     |    |          |         |        |          |     |    |     |    |     |    |     |    |     |    |          |         |          |    |     |           |          |  |
| t-Ferulic acid        |          |         | 0.584954 |          | 0        |         |          |         |         |         |          | 0       |          |         |          |         |         |         |         |          |          |          |          |          |    |     |    |          |         |        |          |     |    |     |    |     |    |     |    |     |    |          |         |          |    |     |           | 0.250916 |  |
| Benzoic acid          | 0.81072  |         |          |          | 0.786383 | 8.4987  | 0.494009 | 1.24531 | 3.61019 | 1.87404 |          |         | 1.14383  | 1.96773 | 1.35952  |         |         |         |         | 1.67374  |          |          |          |          |    |     |    |          | 1.19114 |        |          |     |    |     |    |     |    |     |    |     |    |          |         |          |    |     | 0.978112  | 0.792797 |  |
| Hyperoside            |          |         |          |          | 0        |         |          |         |         |         |          |         |          |         |          |         |         |         |         |          |          |          |          |          |    |     |    |          |         |        |          |     |    |     |    |     |    |     |    |     |    |          |         |          |    |     |           |          |  |
| Rutin                 |          |         |          |          | 0        |         |          |         |         |         |          |         |          |         |          |         |         |         |         |          |          |          |          |          |    |     |    |          |         |        |          |     |    |     |    |     |    |     |    |     |    |          |         |          |    |     |           |          |  |
| Isoquercetin          |          |         |          |          | 0        |         |          |         |         |         |          |         |          |         |          |         |         |         |         |          |          |          |          |          |    |     |    |          |         |        |          |     |    |     |    |     |    |     |    |     |    |          |         |          |    |     |           |          |  |
| Resveratrol           |          |         |          |          | 1.91416  |         |          |         |         |         |          |         |          |         |          |         |         |         |         |          |          |          |          |          |    |     |    |          |         |        |          |     |    |     |    |     |    |     |    |     |    |          |         |          |    |     |           |          |  |
| Rosmarinic acid       |          |         |          |          |          |         |          |         |         |         |          |         |          |         |          |         |         |         |         |          |          |          |          |          |    |     |    |          | 0       |        |          |     |    |     |    |     |    |     |    |     |    |          |         |          |    |     |           |          |  |
| t-Cinnamic acid       | 0.408235 | 0       |          | 0        |          |         | 0        |         | 0       |         | 0        |         | 0        | 0       |          |         |         |         |         |          | 1.33915  |          |          |          |    |     |    |          |         | 0      | 0        | 0   |    |     |    |     |    |     |    |     |    |          |         |          | 0  |     |           |          |  |
| Quercetin             |          |         | 0.833611 |          |          |         | 0.848927 |         |         |         |          |         |          |         |          |         |         |         |         |          |          |          |          |          |    |     |    |          |         |        |          |     |    |     |    |     |    |     |    |     |    |          |         |          |    |     |           |          |  |
| Hesperetin            |          |         |          |          |          |         |          |         |         |         |          |         |          |         |          |         |         |         |         |          |          |          |          |          |    |     |    |          |         |        |          |     |    |     |    |     |    |     |    |     |    |          |         |          |    |     |           |          |  |
| Kaempferol            |          |         |          |          |          |         | 0        |         |         |         |          |         |          |         |          |         |         |         |         |          |          |          |          |          |    |     |    | 0        | 0       | 0      | 0        | 0   | 0  | 0   | 0  | 0   | 0  | 0   | 0  | 0   | 0  | 0        | 0       | 0        | 0  | 0   | 0         | 0        |  |
| Carvacrol             | 0        |         | 0        | 0        |          |         |          |         |         |         | 0        |         |          |         |          | 0       | 0       | 0       | 0       | 0        | 0        | 0        | 0        | 0        | 0  | 0   | 0  | 0        | 0       | 0      | 0        | 0   | 0  | 0   | 0  | 0   | 0  | 0   | 0  | 0   | 0  | 0        | 0       | 0        | 0  | 0   | 0         |          |  |
| Thymol                | 0        |         |          | 0        |          |         | 0        |         |         |         | 0        |         |          |         |          |         |         |         |         |          |          |          |          |          |    |     |    |          |         |        |          |     |    |     |    |     |    |     |    |     |    |          |         |          |    |     |           |          |  |
| Flavone               | 0        |         |          |          |          |         |          |         |         |         | 0        |         |          |         |          |         |         |         |         |          |          |          |          |          |    |     |    |          |         |        |          |     |    |     |    |     |    |     |    |     |    |          |         |          |    |     |           |          |  |

Table S3. Quantitative analysis of phenolic compounds in the extracts.
