# Supplementary material for: Untargeted Metabolomics Used to Describe the Chemical Composition, Antioxidant and Antimicrobial Effects of Extracts from Pleurotus spp. Mycelium Grown in Different Culture Media
Source: MDPI journal article supplement (doi:10.3390/antibiotics11111468), 2022-10-25
Supplement: s1 [file s1]

# Chromatogram

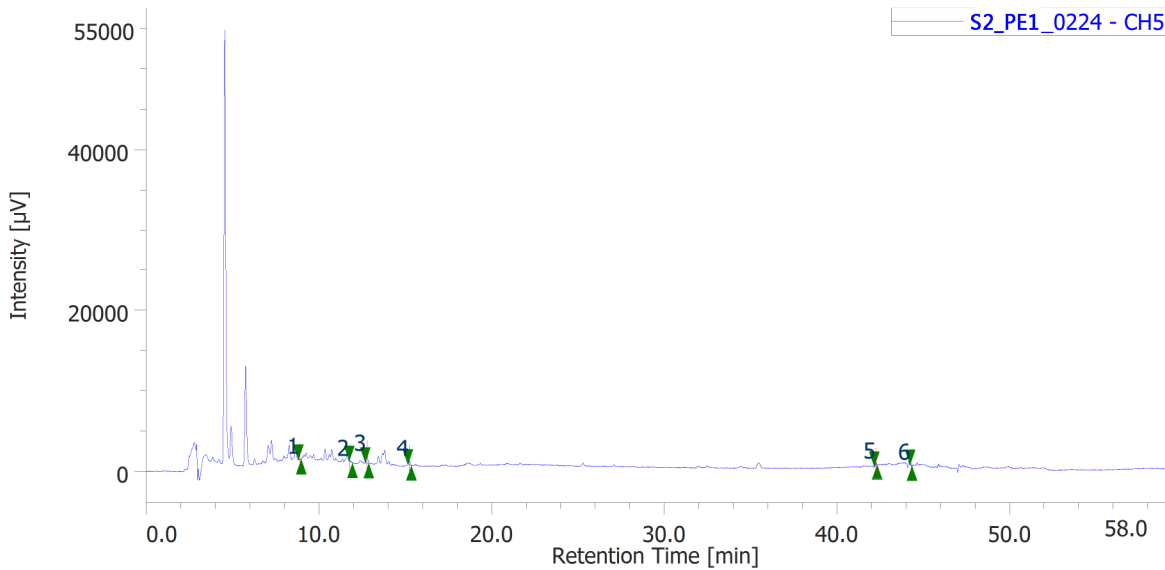

## Chromatogram Information

|                        |                                       |
|------------------------|---------------------------------------|
| User Name              | Administrator                         |
| Date Modified          | 3/21/2022 10:35:59 AM                 |
| Description            |                                       |
| HPLC System Name       | HPLC2_DAD                             |
| Injection Date         | 2/26/2022 4:30:27 AM                  |
| Volume                 | 5.00 [µL]                             |
| Sample #               | 25                                    |
| Project Name           | Phenols_08_03_2022                    |
| Acquisition Time       | 59.0 [min]                            |
| Acquisition Sequence   |                                       |
| Control Method         |                                       |
| Peak ID Table          | PeakID_PhenolicCompound_18_02_2022_86 |
| Calibration Method     | Phenols_QUANT_CALIB_05_03_2022_Ch5-9  |
| Additional Information |                                       |

## Channel & Peak Information Table

|                   |                                         |
|-------------------|-----------------------------------------|
| Chromatogram Name | S2_PE1_0224-CH5                         |
| Sample Name       |                                         |
| Channel Name      | 254.0nm                                 |
| Sampling Interval | 200 [msec]                              |
| Peak Method       | PeakMethod_05_03_2022_Extracts (Manual) |

| # | Peak Name        | CH | tR [min] | Area [µV·sec] | Height [µV] | Quantity        |
|---|------------------|----|----------|---------------|-------------|-----------------|
| 1 | Gallic acid      | 5  | 8.893    | 362           | 86          | N/A             |
| 2 | 3-Hydroxytyrosol | 5  | 11.790   | 583           | 82          | N/A             |
| 3 | Caftaric acid    | 5  | 12.780   | 5308          | 907         | 1.19602 [ug/mL] |
| 4 | Catechin         | 5  | 15.233   | 2919          | 507         | 3.15742 [ug/mL] |
| 5 | Kaempferol       | 5  | 42.257   | 1435          | 257         | N/A             |
| 6 | Carvacrol        | 5  | 44.273   | 313           | 96          | N/A             |
