# Supplementary material for: Untargeted Metabolomics Used to Describe the Chemical Composition, Antioxidant and Antimicrobial Effects of Extracts from Pleurotus spp. Mycelium Grown in Different Culture Media
Source: MDPI journal article supplement (doi:10.3390/antibiotics11111468), 2022-10-25
Supplement: s1 [file s1]

# Chromatogram

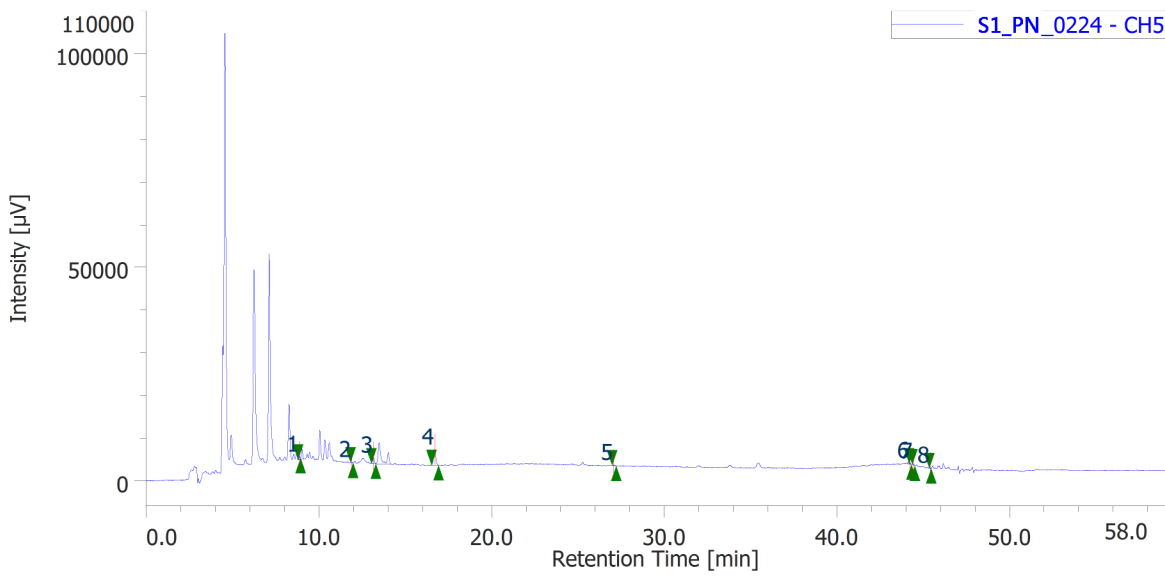

Chromatogram Information

User NameAdministrator

Date Modified3/14/2022 11:19:38 AM

DescriptionHPLC2\_DAD

HPLC System Name2/25/2022 6:25:29 PM

Injection Date5.00 [µL]

Volume15

Sample #Phenols\_08\_03\_2022

Project NameAcquisition Time59.0 [min]

Acquisition Sequence

Control Method

Peak ID TablePeakID\_PhenolicCompound\_18\_02\_2022\_86

Calibration MethodPhenols\_QUANT\_CALIB\_05\_03\_2022\_Ch5-9

Additional Information

Channel & Peak Information Table

Chromatogram NameS1\_PN\_0224-CH5

Sample Name

Channel Name254.0nm

Sampling Interval200 [msec]

Peak MethodPeakMethod\_05\_03\_2022\_Extracts (Manual)

| # | Peak Name             | CH | tR [min] | Area [µV·sec] | Height [µV] | Quantity         |
|---|-----------------------|----|----------|---------------|-------------|------------------|
| 1 | Gallic acid           | 5  | 8.877    | 3575          | 743         | N/A              |
| 2 | 3-Hydroxytyrosol      | 5  | 11.903   | 573           | 131         | N/A              |
| 3 | Caftaric acid         | 5  | 13.153   | 9035          | 1450        | 1.51619 [ug/mL]  |
| 4 | 4-Hydroxybenzoic acid | 5  | 16.693   | 32678         | 3658        | N/A              |
| 5 | Benzoic acid          | 5  | 27.057   | 1686          | 212         | 0.786383 [ug/mL] |
| 6 | Carvacrol             | 5  | 44.223   | 1637          | 362         | N/A              |
| 7 | Thymol                | 5  | 44.407   | 1611          | 279         | N/A              |
| 8 | 3-Hydroxyflavone      | 5  | 45.390   | 602           | 175         | N/A              |
