# Supplementary material for: Untargeted Metabolomics Used to Describe the Chemical Composition, Antioxidant and Antimicrobial Effects of Extracts from Pleurotus spp. Mycelium Grown in Different Culture Media
Source: MDPI journal article supplement (doi:10.3390/antibiotics11111468), 2022-10-25
Supplement: s1 [file s1]

# Chromatogram

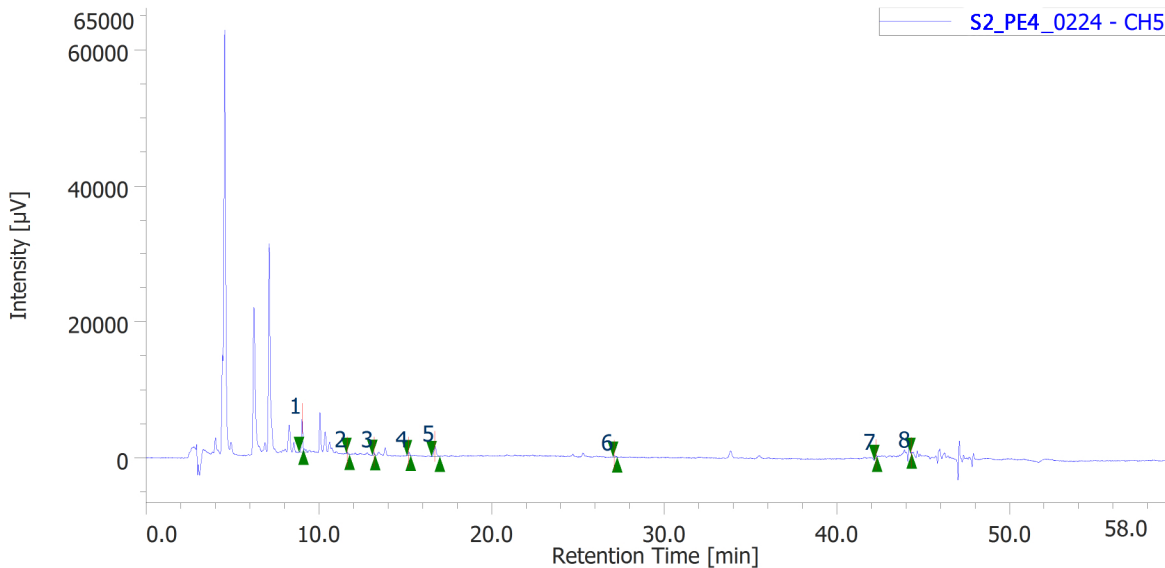

Chromatogram Information

|                        |                                       |
|------------------------|---------------------------------------|
| User Name              | Administrator                         |
| Date Modified          | 3/21/2022 10:36:01 AM                 |
| Description            |                                       |
| HPLC System Name       | HPLC2_DAD                             |
| Injection Date         | 2/26/2022 2:35:19 PM                  |
| Volume                 | 5.00 [µL]                             |
| Sample #               | 33                                    |
| Project Name           | Phenols_08_03_2022                    |
| Acquisition Time       | 59.0 [min]                            |
| Acquisition Sequence   |                                       |
| Control Method         |                                       |
| Peak ID Table          | PeakID_PhenolicCompound_18_02_2022_86 |
| Calibration Method     | Phenols_QUANT_CALIB_05_03_2022_Ch5-9  |
| Additional Information |                                       |

Channel & Peak Information Table

|                   |                                         |
|-------------------|-----------------------------------------|
| Chromatogram Name | S2_PE4_0224-CH5                         |
| Sample Name       |                                         |
| Channel Name      | 254.0nm                                 |
| Sampling Interval | 200 [msec]                              |
| Peak Method       | PeakMethod_05_03_2022_Extracts (Manual) |

| # | Peak Name             | CH | tR [min] | Area [µV·sec] | Height [µV] | Quantity          |
|---|-----------------------|----|----------|---------------|-------------|-------------------|
| 1 | Gallic acid           | 5  | 9.023    | 24885         | 4901        | 0.951539 [ug/mL]  |
| 2 | 3-Hydroxytyrosol      | 5  | 11.640   | 1116          | 222         | 0.0341761 [ug/mL] |
| 3 | Caftaric acid         | 5  | 13.177   | 1967          | 394         | 0.908978 [ug/mL]  |
| 4 | Catechin              | 5  | 15.183   | 3259          | 484         | 3.49181 [ug/mL]   |
| 5 | 4-Hydroxybenzoic acid | 5  | 16.713   | 14429         | 1483        | N/A               |
| 6 | Benzoic acid          | 5  | 27.090   | 1571          | 200         | 0.744453 [ug/mL]  |
| 7 | Kaempferol            | 5  | 42.267   | 2666          | 465         | N/A               |
| 8 | Carvacrol             | 5  | 44.280   | 183           | 91          | N/A               |
