# Supplementary material for: Untargeted Metabolomics Used to Describe the Chemical Composition, Antioxidant and Antimicrobial Effects of Extracts from Pleurotus spp. Mycelium Grown in Different Culture Media
Source: MDPI journal article supplement (doi:10.3390/antibiotics11111468), 2022-10-25
Supplement: s1 [file s1]

# Chromatogram

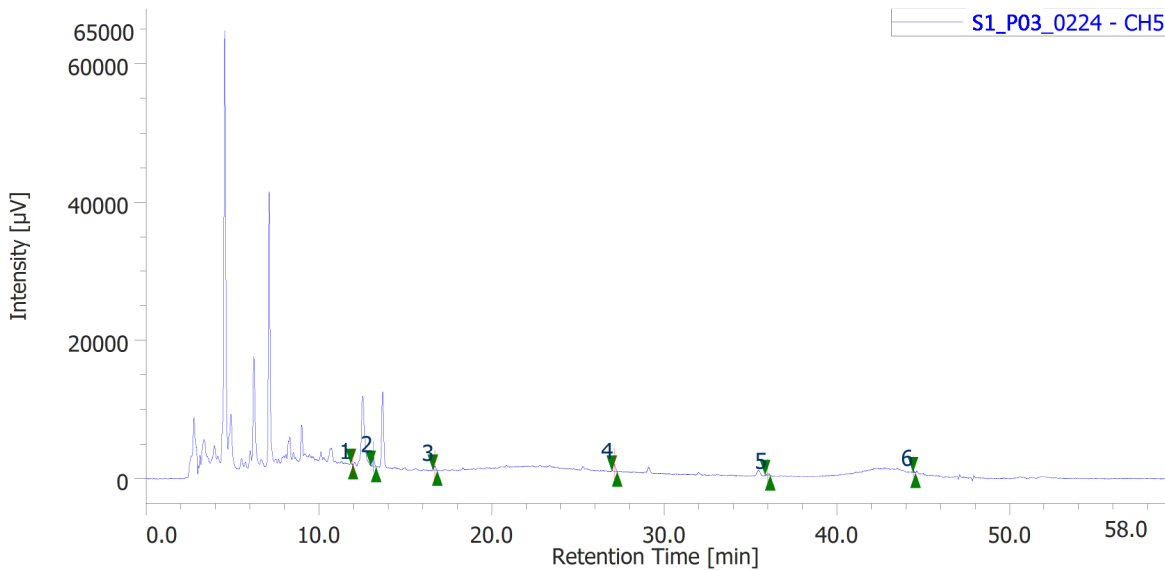

Chromatogram Information

User NameAdministrator

Date Modified3/14/2022 11:26:04 AM

Description

HPLC System NameHPLC2\_DAD

Injection Date2/25/2022 9:27:00 PM

Volume5.00 [µL]

Sample #19

Project NamePhenols\_08\_03\_2022

Acquisition Time59.0 [min]

Acquisition Sequence

Control Method

Peak ID TablePeakID\_PhenolicCompound\_18\_02\_2022\_86

Calibration MethodPhenols\_QUANT\_CALIB\_05\_03\_2022\_Ch5-9

Additional Information

Channel & Peak Information Table

Chromatogram NameS1\_P03\_0224-CH5

Sample Name

Channel Name254.0nm

Sampling Interval200 [msec]

Peak MethodPeakMethod\_05\_03\_2022\_Extracts (Manual)

| # | Peak Name             | CH | tR [min] | Area [µV·sec] | Height [µV] | Quantity        |
|---|-----------------------|----|----------|---------------|-------------|-----------------|
| 1 | 3-Hydroxytyrosol      | 5  | 11.910   | 227           | 59          | N/A             |
| 2 | Caftaric acid         | 5  | 13.163   | 8502          | 1363        | 1.47035 [ug/mL] |
| 3 | 4-Hydroxybenzoic acid | 5  | 16.707   | 4862          | 640         | N/A             |
| 4 | Benzoic acid          | 5  | 27.090   | 9390          | 1047        | 3.61019 [ug/mL] |
| 5 | t-Cinnamic acid       | 5  | 35.970   | 2703          | 260         | N/A             |
| 6 | Thymol                | 5  | 44.450   | 1145          | 243         | N/A             |
